# Supplementary material
Source: PubMed Central journal article supplement (PMC6205407)
Supplement: jci-128-99902-s080.pdf [file jci-128-99902-s080.pdf]

1 **Peli1 facilitates virus replication and promotes neuroinflammation during West Nile virus**  
2 **infection**

3 Huanle Luo <sup>1,+</sup>, Evandro R Winkelmann <sup>1,+</sup>, Shuang Zhu <sup>2</sup>, Wenjuan Ru <sup>3</sup>, Elizabeth Mays <sup>1</sup>,  
4 Jesus A Silvas <sup>4</sup>, Lauren L Vollmer <sup>5</sup>, Junling Gao <sup>3</sup>, Bi-Hung Peng <sup>3</sup>, Nathen E Bopp <sup>4</sup>, Courtney  
5 Cromer <sup>4</sup>, Chao Shan <sup>6</sup>, Guorui Xie <sup>1</sup>, Guangyu Li <sup>1</sup>, Robert Tesh <sup>4,7</sup>, Vsevolod L Popov <sup>4,7</sup>, Pei-  
6 Yong Shi <sup>6,7</sup>, Shao-Cong Sun <sup>8</sup>, Ping Wu <sup>3,7</sup>, Robyn S Klein <sup>5</sup>, Shao-Jun Tang <sup>3,7</sup>, Wenbo Zhang  
7 <sup>2,3,7</sup>, Patricia V. Aguilar <sup>4,7</sup>, and Tian Wang <sup>1,4,7,\*</sup>

8  
9 <sup>1</sup>Department of Microbiology & Immunology, University of Texas Medical Branch, Galveston,  
10 TX, 77555, USA. <sup>2</sup>Department of Ophthalmology and Visual Sciences, University of Texas  
11 Medical Branch, Galveston, TX, 77555, USA. <sup>3</sup>Department of Neuroscience, Cell Biology and  
12 Anatomy, University of Texas Medical Branch, Galveston, TX, 77555, USA. <sup>4</sup>Department of  
13 Pathology, University of Texas Medical Branch, Galveston, TX, 77555, USA. <sup>5</sup>Department of  
14 Medicine, Washington University School of Medicine, St. Louis, MO 63110, USA. <sup>6</sup>Department  
15 of Biochemistry & Molecular Biology, University of Texas Medical Branch, Galveston, TX,  
16 77555, USA. <sup>7</sup>Institute for Human Infections & Immunity, University of Texas Medical Branch,  
17 Galveston, TX, 77555, USA. <sup>8</sup>Department of Immunology, The University of Texas MD  
18 Anderson Cancer Center, Houston, Texas, USA.

19 + These authors contributed equally to this work

20 \* Address correspondence to: Tian Wang, Departments of Microbiology & Immunology and  
21 Pathology, University of Texas Medical Branch, Keiller 3.118B, 301 University Boulevard,  
22 Galveston, TX, 77555-0609, USA. Telephone: +1-409-772-3146; E-mail: [ti1wang@utmb.edu](mailto:ti1wang@utmb.edu)

23  
24 **Figures: 8; Supplemental Figures: 7; Supplemental Table: 1**

25 **Running Title: Peli1 facilitates West Nile virus replication**

26

27 **Abstract:**

28           The E3 ubiquitin ligase - Pellino (Peli)1 is a microglia-specific mediator of autoimmune  
29 encephalomyelitis. Its role in neurotropic flavivirus infection is largely unknown. Here, we report  
30 that mice deficient of Peli1 (*Peli1*<sup>-/-</sup>) were more resistant to lethal West Nile virus (WNV)  
31 infection and exhibited reduced viral loads in tissues and attenuated brain inflammation. Peli1  
32 mediates chemokine and proinflammatory cytokine production in microglia and promotes T cells  
33 and macrophages infiltration into the central nervous system. Unexpectedly, Peli1 was required  
34 for WNV entry and replication in mouse macrophages, and mouse and human neurons and  
35 microglia. It was also highly expressed on WNV-infected neurons and adjacent inflammatory  
36 cells in acute post-mortem WNV encephalitis patients. WNV- passaged in *Peli1*<sup>-/-</sup>  
37 macrophages or neurons induced a lower viral load and impaired activation in wild-type  
38 microglia thereby a reduced lethality in mice. Smaducin-6, which blocks interactions between  
39 Peli1 to IRAK1, RIP1, and IKK $\epsilon$  did not inhibit WNV-triggered microglia activation. Collectively,  
40 our findings suggest a non- immune regulator role of Peli1 in promoting microglia activation  
41 during WNV infection and identify a potential novel host factor for flavivirus cell entry and  
42 replication.

43

44

45

## 46 INTRODUCTION

47 Pellino (Peli)1, an E3 ubiquitin ligase, is an important regulator in innate and adaptive  
48 immunity. It is essential for nuclear factor (NF)- $\kappa$ B activation induced by TIR-domain-containing,  
49 adapter-inducing interferon- $\beta$  (TRIF)/toll-like receptor (TLR)-mediated signaling in innate  
50 immune cells such as macrophages and dendritic cells (DCs) (1). In microglial cells, where Peli1  
51 is predominantly expressed in the brain, it regulates TLR/MyD88 signaling by promoting  
52 degradation of TNF receptor-associated factor 3 (Traf3), a process which leads to microglia  
53 activation during the course of induction of experimental autoimmune encephalomyelitis (EAE)  
54 (2). Peli1 is also implicated in regulation of adaptive immune cell functions. For example, it is a  
55 critical factor in the maintenance of peripheral T cell tolerance by regulating c-Rel via its K48  
56 ubiquitination (3). Peli1 upregulation plays a role in B cell lymphomas tumorigenesis (4).

57 West Nile virus (WNV), a mosquito-borne, single-stranded flavivirus that caused  
58 outbreaks in Asia, Europe, and Australia, has been the leading cause of viral encephalitis in the  
59 United States (US) for more than one decade (5, 6). The features of acute illness range from  
60 WN fever to neuroinvasive conditions, including meningitis, encephalitis, acute flaccid paralysis,  
61 and death (7). In addition, up to 50% of WNV convalescent patients have been reported to  
62 have long-term neurological sequelae or chronic kidney disease (8-16). Currently, there is no  
63 specific therapeutic agent for treatment of WNV infection, and an approved vaccine is not  
64 available for humans. Studies in animal models suggest that WNV-induced central nervous  
65 system (CNS) disease is caused by neuronal degeneration, a direct result of viral infection,  
66 and/or by bystander damage from the immune response to the pathogen in the CNS (17, 18)  
67 that is induced by infiltrating inflammatory cells and CNS resident cells, including  
68 microglia/macrophages, neutrophils, and lymphocytes (19-23). Microglial cells, the resident  
69 macrophages of the CNS that express various pattern recognition receptors (PRRs), become  
70 activated and produce innate proinflammatory molecules upon encountering microbial infection.  
71 Microglia activation in the CNS is the hallmark of acute WNV- infection (24, 25). It was also

72 shown to drive neuronal and synaptic loss which together contributes to memory impairment in  
73 WNV-induced chronic cognitive sequelae (26). The underlying immune mechanisms of  
74 microglia activation are not clearly understood. Here, we hypothesize that Peli1 mediates the  
75 activation of microglia and promotes neuroinflammation during lethal WNV infection.  
76 Unexpectedly, we found that Peli1 is required for WNV entry and replication in both peripheral  
77 myeloid cells and CNS resident cells. In particular, a defective WNV replication in Peli1-  
78 deficient microglia and neurons directly contributes to attenuated neuroinflammation in the CNS  
79 and ultimately decreases host susceptibility to lethal encephalitis.

80

81

82 **RESULTS**

83 ***Peli1*<sup>-/-</sup> mice were more resistant to systemic WNV infection.**

84 Peli1 promotes microglia-mediated brain inflammation in the course of EAE induction  
85 (2). To investigate the role of Peli1 in WNV encephalitis, we infected WT and *Peli1*<sup>-/-</sup> mice i.p.  
86 with 100 FFU WNV 385-99 strain and monitored daily for survival (Figure 1A). *Peli1*<sup>-/-</sup> mice  
87 (39% survival) were more resistant to WNV infection than WT controls (9.5% survival). To  
88 further understand viral pathogenesis, we measured viral burden in the peripheral organs and  
89 brain. *Peli1*<sup>-/-</sup> mice had lower viremia at days 2 and 3 post infection (pi) and decreased splenic  
90 viral load at day 6 compared to WT mice (Figure 1, B and C). WNV crosses the blood brain  
91 barrier (BBB) and infects the CNS around day 3 in mice (25). Viral RNA levels in *Peli1*<sup>-/-</sup>  
92 mouse brains were more than 15-fold lower than that of WT mice at day 6 pi (Figure 1D). This  
93 trend continued but became insignificant at day 9 when both groups of mice started to succumb  
94 to lethal WNV infection. On day 6 pi, meningitis (inflammation of the leptomeninge) was noted in  
95 WT mice, but not in *Peli1*<sup>-/-</sup> mice (Figure 1E). Inflammation further spread to the brain  
96 parenchyma (encephalitis) as seen in striatum, hippocampus, and cerebellum in both groups of  
97 mice at day 9. Encephalitis, particularly perivascular cuffing and microglia activation (cells with  
98 elongated nuclei), was much more extensive in WT mice. Thus, CNS inflammation started  
99 earlier and was more severe in WNV-infected WT mice compared to *Peli1*<sup>-/-</sup> mice. No  
100 histopathology differences were noted in naïve mouse brains between WT and *Peli1*<sup>-/-</sup> groups  
101 (Supplemental Figure 1).

102

103 ***Peli1*<sup>-/-</sup> mice exhibited impaired innate cytokine production, but modestly enhanced**  
104 **adaptive immune responses in the periphery.**

105 Peli1 is known to facilitate TRIF-dependent TLR signaling and proinflammatory cytokine  
106 production (1). Following WNV infection, Peli1 expression was increased in the blood of WT  
107 mice (Supplemental Figure 2A). The RNA levels of interferon (*Ifn*)*a* and *Ifnb* at day 6,

108 interleukin (*Il*)6, tumor necrosis factor (*Tnf*) $\alpha$  at days 3 and 6, and *Il*12 at day 3 were all  
109 diminished in *Peli1*<sup>-/-</sup> mice (Supplemental Figure 2B). The blood plasma protein levels of IL-1 $\beta$   
110 and IL-10 were also reduced in *Peli1*<sup>-/-</sup> mice (Supplemental Table 1), though no differences  
111 were noted in plasma IFN- $\gamma$  and IL-17 levels between the two groups of mice. To study  
112 adaptive immune responses in the periphery, we first measured antibody production in the  
113 blood. WNV -specific IgM responses were modestly enhanced in *Peli1*<sup>-/-</sup> mice at days 3 and 9  
114 pi (Supplemental Figure 2C). WNV-specific IgG responses were similar between the two  
115 groups of mice (Supplemental Figure 2D). *Peli1* is also known to negatively regulate T cell  
116 signaling (3). We next collected the spleen tissues from naive and WNV infected WT and  
117 *Peli1*<sup>-/-</sup> mice. No necrosis was observed in any of the spleen sections examined. There was a  
118 trend of the white pulp expansion resulting from germinal center proliferation in WT group at  
119 days 3 and 6 pi, but returned to similar levels as naive mice at day 9; in *Peli1*<sup>-/-</sup> mice the  
120 expansion was continuously enhanced (Supplemental Figure 2, E and F). On day 7, both  
121 splenic CD4<sup>+</sup> and CD8<sup>+</sup> T cells of *Peli1*<sup>-/-</sup> mice produced more IFN- $\gamma$  than WT mice upon *ex vivo*  
122 re-stimulation with WNV-specific peptides. CD4<sup>+</sup> T cells of *Peli1*<sup>-/-</sup> mice also induced higher IL-  
123 6 and IL-10 production (Supplemental Figure 2, G and H).

124

125 ***Peli1* was required for WNV entry and viral replication in macrophages and dendritic cell**  
126 **(DC)s which further activated innate cytokine responses.**

127         Macrophages and DCs are innate immune cells expressing many PRRs and both cell  
128 types are permissive to WNV infection in the peripheral organs (27). To study *Peli1*-mediated  
129 innate immune responses upon WNV infection, we first measured viral loads in these two cell  
130 types by quantitative (q)PCR and focus-forming assays (FFA) and found that both viral RNA  
131 levels and viral titers were significantly diminished in primary myeloid *Peli1*<sup>-/-</sup> macrophages and  
132 DCs compared to WT controls (Figure 2, A and B and Supplemental Figure 3, A and B). We

133 next performed virus attachment and entry assays to determine Peli1 involvement in the WNV  
134 replication cycle. Macrophages of both groups were incubated with WNV (MOI of 3 or 10) at 4°C  
135 for 1 h, allowing the virus to attach to the cell surface. After 1 h incubation, the cells were  
136 washed to remove unattached virus, and the amounts of viruses that had attached to the cell  
137 surface were measured by qPCR. It was noted that *Peli1*<sup>-/-</sup> macrophages attached 28% less  
138 virus than the WT cells (Figure 2C). Cells were further incubated at 37°C to initiate viral entry. At  
139 1.5 h and 5 h pi, the infected cells were stringently washed to remove free virus as well as cell  
140 surface-associated virus, and the intracellular viral RNA was quantified. As shown in Figure 2D,  
141 levels of viral RNA in *Peli1*<sup>-/-</sup> macrophages were 27% to 54% lower than those of WT cells.  
142 These results indicated that Peli1 is involved in WNV attachment and entry. To confirm these  
143 results, we performed ultrastructural analysis of macrophages of both groups at 0 min, 5 min,  
144 and 10 h after exposure to WNV (Figure 2, E and F). At 0 h, we observed 16 WNV particles  
145 ranging between 41 to 46 nm in diameter associated with the plasma membrane in WT  
146 macrophages; whereas a total of 7 WNV particles were found in association with the plasma  
147 membrane of *Peli1*<sup>-/-</sup> macrophages. At 5 m pi, 38 viral particles with a diameter of about 42 nm  
148 were noted in small uncoated vesicles of WT macrophages. However, only 11 WNV particles  
149 with the same size were identified in *Peli1*<sup>-/-</sup> macrophages. By 10 h, there were 55 WNV viral  
150 particles with a diameter of 42 nm inside the double membrane vesicles of WT macrophages.  
151 Interestingly, 18 viral particles with much smaller size (about 25 nm) were found inside the  
152 double membrane vesicles of *Peli1*<sup>-/-</sup> macrophages (Figure 2, E-F). At day 4 pi, virus particles  
153 detected in the supernatants of WT macrophages ranged in diameter from 41 nm to 47 nm,  
154 which are in similar dimensions to those previously reported (28); whereas virions detected in  
155 the supernatant of the *Peli1*<sup>-/-</sup> macrophages showed significant variations in size ranging from  
156 23.5 nm to 39.5 nm (Figure 2G). These observations suggest that Peli1 not only plays a role in  
157 the initial cell attachment and entry, but also in other aspects of WNV life cycle within the host  
158 cells. We next determined the infectivity of WNV that was passaged in WT or *Peli1*<sup>-/-</sup>

159 macrophages. WNV passaged in *Peli1*<sup>-/-</sup> macrophages had a lower replication rate in WT  
160 macrophages versus WNV passage in WT cells (Figure 2H). Furthermore, we challenged WT  
161 and *Peli1*<sup>-/-</sup> mice with 100 FFU of WNV passaged in WT or *Peli1*<sup>-/-</sup> macrophages. WT mice  
162 infected with WNV passaged in *Peli1*<sup>-/-</sup> macrophages showed an increased survival rate  
163 (28.5%, Figure 2I) compared to WT mice infected with WNV passaged in WT cells (0%).  
164 *Peli1*<sup>-/-</sup> mice infected with WNV passaged either in WT macrophages (43%) or *Peli1*<sup>-/-</sup> cells  
165 (56%) also showed similar resistance to lethal WNV infection.

166 We next determined if Peli1 mediated immune responses during WNV infection in  
167 macrophages and DCs. Following WNV infection, *Peli1* expression was upregulated in  
168 macrophages at day 4. In contrast, the other two Pellino family members, including *Peli2* and  
169 *Peli3*, remained at low levels (Figure 3A). Compared to WT cells, *Peli1*<sup>-/-</sup> macrophages had  
170 reduced *Ifna* and *Ifnb* RNA levels at days 1 and 4 after WNV infection (Figure 3, B and C).  
171 Production of inflammatory cytokines, including IL-6, TNF- $\alpha$ , and IL-12, was also impaired in  
172 *Peli1*<sup>-/-</sup> macrophages at day 4 (Figure 3, D-F). WNV infection in *Peli1*<sup>-/-</sup> DCs also resulted in  
173 diminished levels of *Ifnb*, *Il1b*, and *Il12* compared to WT DCs (Supplemental Figure 3C). PRRs,  
174 including TLR3, TLR7, and retinoid acid-inducible gene-I (RIG-I) –like receptor (RLR)s, such as  
175 RIG-I and melanoma differentiation antigen 5 (MDA-5), are involved in WNV recognition and  
176 trigger the signaling cascade leading to the production of type 1 IFNs and pro-inflammatory  
177 cytokines (25, 29-31). To understand the role of Peli1 in PRR-mediated signaling pathways, we  
178 treated WT and *Peli1*<sup>-/-</sup> macrophages with TLR agonists (Poly I:C for TLR3, CL097 for TLR7,  
179 and Poly I:C LyoVec for RLRs). Both Poly I:C or Poly I:C/LyoVec triggered lower *Ifna*, *Ifnb*, *Il6*,  
180 and *Il12* levels in *Peli1*<sup>-/-</sup> macrophages. In contrast, stimulation with TLR7 agonist induced  
181 similar antiviral cytokine responses in both groups of macrophages (Supplemental Figure 3, D-  
182 G). Peli1 is known to be dispensable for MyD88-dependent TLRs, but is required for TRIF-  
183 dependent TLR signaling in macrophages and DCs (1). Consistent with the previous findings,  
184 we demonstrate that Peli1 positively regulates TLR3 and RLR but not TLR7 -mediated innate



185 cytokine responses in macrophages. Finally, to understand the effects of defective viral  
186 replication on antiviral immunity, we infected WT macrophages with the same dose of WNV  
187 passaged once in WT or *Peli1*<sup>-/-</sup> macrophages. Interestingly, WNV passaged in *Peli1*<sup>-/-</sup> cells  
188 triggered diminished *Ifnb* RNA and IL-6 protein levels in WT macrophages compared to those  
189 isolated from WT cells. The levels of reduction induced by WNV passaged in *Peli1*<sup>-/-</sup> cells were  
190 similar to WT virus induced in *Peli1*<sup>-/-</sup> cells (Figure 3G and Supplemental Figure 3H).  
191 Collectively, these data show that Peli1 positively mediates antiviral cytokine responses mainly  
192 by a direct involvement in WNV replication life cycle in macrophages and DCs.

193

#### 194 **Peli1 was predominantly involved in CNS inflammation during WNV infection**

195 Peli1 was previously reported to be highly expressed by neural tissues (2). Here, we  
196 noted *Peli1* expression was induced in the brain on days 6 and 9 pi (Figure 4A). The mRNA  
197 levels of inflammatory cytokines including *Il1b*, *Il6*, and *Tnfa* and chemokines such as *Ccl2*,  
198 *Ccl7*, and *Cxcl10* were decreased in *Peli1*<sup>-/-</sup> mice (Figure 4B-G). *Ifnb* but not *Ifna* RNA levels  
199 were also reduced in *Peli1*<sup>-/-</sup> mouse brains (Supplemental Figure 4, A and B). To study brain  
200 leukocyte phenotype, we performed flow cytometry analysis of these cells isolated at day 9 and  
201 found that the number and the percentage of infiltrating CD4<sup>+</sup> T cells, activated microglial cells  
202 (CD11b<sup>hi</sup>CD45<sup>lo</sup>), and macrophages (CD11b<sup>hi</sup>CD45<sup>hi</sup>) were decreased up to 60% in *Peli1*<sup>-/-</sup>  
203 mice (Figure 4, H-I & Supplemental Figure 4C). To exclude the effects of Peli1 on WNV  
204 infection in the periphery tissues, we inoculated WNV intracranially (i.c.) into both groups of  
205 mice (Figure 4J). *Peli1*<sup>-/-</sup> mice showed a similar resistance as in systemic WNV infection (44%  
206 versus 11%, *Peli1*<sup>-/-</sup> versus WT). Collectively, these results indicate that Peli1 is involved in  
207 WNV encephalitis predominantly by mediating CNS infection and induction of  
208 neuroinflammation.

209

210 **Peli1 promoted microglia activation via facilitating WNV replication in neurons and**  
211 **microglia in mice and humans.**

212 Microglial cells are involved in CNS neuroinflammation (24, 32) and are permissive to  
213 WNV infection (Supplemental Figure 5A). *Peli1* is highly expressed on microglial cells (2) and  
214 was enhanced following WNV infection, however, *Peli2* and *Peli3* remained at low levels (Figure  
215 5A and Supplemental Figure 5B). WNV triggered higher mRNA levels of inflammatory  
216 cytokines (*Tnfa* and *Il12*) and chemokines (*Ccl2*, *Ccl4*, and *Cxcl10*) in microglial cells  
217 (Supplemental Figure 5C). Interestingly, WNV infection was nearly abolished in both *Peli1*<sup>-/-</sup>  
218 primary microglial cells (Figure 5, B and C) and Peli1-depleted microglial cells (Supplemental  
219 Figure 5D), which was accompanied by diminished levels of inflammatory cytokines and  
220 chemokines (Figure 5D and Supplemental Figure 5E). Neurons are most permissive to WNV  
221 infection in the CNS (18, 33). WNV infection upregulates *Peli1* expression on neurons up to  
222 200% (Figure 5E). WNV replication was also significantly reduced in *Peli1*<sup>-/-</sup> neurons compared  
223 to WT neurons (Figure 5, F and G). The mRNA levels of chemokines (*Ccl2*, *Ccl7*, *Cxcl10*),  
224 inflammatory cytokine (*Il6*), and *Ifnb* were all diminished in WNV-infected *Peli1*<sup>-/-</sup> neurons at day  
225 4 (Figure 5H, and Supplemental Figure 5F). Western blot analysis showed that the  
226 phosphorylation levels of p38MAPK and p65 were both reduced in WNV- infected *Peli1*<sup>-/-</sup>  
227 neurons at day 3 compared to WT controls (Supplemental Figure 5, G and H) which suggests a  
228 role of Peli1 in positive regulation of NF-κB and p38MAPK activation.

229 Immunostaining of acute post-mortem WNV encephalitis patient hippocampal tissues  
230 show membrane Peli1 on WNV- positive neurons and adjacent inflammatory cells, but not in the  
231 same region of the age-match patient controls (Figure 6A). *Peli1* expression was also  
232 upregulated following in vitro WNV infection in SHSY-5Y- differentiated neurons and HMC3 cells  
233 (human microglial cell line (Figure 6, B and C) and WNV- infected PBMCs (Supplemental Figure  
234 6A). Nevertheless, its expression was not changed in WNV-infected neural stem cell- derived  
235 neurons nor THP1- derived macrophages (Supplemental Figure 6A). Knockdown of Peli1

236 expression on human microglial cells or SHSY-5Y- differentiated neurons decreased viral loads  
237 by 20- 35% at day 4 pi (Figure 6, D and E and Supplemental Figure 6B). *Peli1* deficiency also  
238 decreased IL-6, CCL2 and CCL5 production in human microglial cells (Figure 6, F-H). WNV  
239 infection did not induce inflammatory cytokine or chemokine production in human neurons (data  
240 not shown). It was noted that *Peli1* knockdown (36% reduction, Supplemental Figure 6C) in  
241 human fetal cortical neural stem cells (hNSCs)- derived neurons led to a 30% decrease on *Irfn*  
242 levels at day 4 pi compared to control-siRNA- treated neurons (Supplemental Figure 6D). These  
243 data suggests that *Peli1* is involved in WNV replication in neural cells and induction of  
244 inflammatory cytokines and chemokines in human microglial cells.

245 To determine if defective replication contributes to attenuated inflammatory responses in  
246 the CNS, we infected WT microglial cells with WNV passaged in WT or *Peli1*<sup>-/-</sup> neurons or  
247 macrophages. WT microglia- infected with WNV grown in *Peli1*<sup>-/-</sup> cells had lower viral titers  
248 (Figure 7, A and B) and reduced mRNA levels of *Irf6*, *Ccl2*, and *Ccl7*, but not *Tnfa* and *Cxcl10*  
249 (Figure 7, C -E) compared to cells infected with WNV grown in WT cells. It is known that  
250 microglia respond to viral infection via activation of p38MAPK (24). Microglia infected with WNV  
251 passaged in *Peli1*<sup>-/-</sup> cells also showed lower phosphorylation levels of p38MAPK than infected  
252 with WNV passaged in WT neurons (Figure 7F). Smaducin-6, a membrane-tethered palmitic  
253 acid-conjugated peptide composed of amino acids 422-441 of Smad6 was reported to interact  
254 with *Peli1* and disrupt the formation of IRAK1, RIP-1, and IKK $\epsilon$ , but not MAPK mediated  
255 signaling complexes (34). Smaducin-6 treatment did not block WNV infection nor induction of  
256 inflammatory cytokine/chemokine production in microglial cells or macrophages, though it  
257 decreased levels of type 1 IFNs in macrophages (Figure 7G-H & Supplemental Figure 7).  
258 Overall, our results suggest that *Peli1* is required for WNV replication in the neural cells which  
259 promotes p38MAPK activation in microglia and induction of inflammatory immune responses in  
260 the CNS.

261

262 **DISCUSSION**

263 Peli1 has been reported to be an important mediator in activation of NF- $\kappa$ B or p38MAPK  
264 in TLR- dependent signaling pathways (2). In this study, we have provided evidence  
265 demonstrating that Peli1 facilitates WNV replication and mediates innate immunity in the  
266 periphery and CNS (Figure 8). In particular, we conclude that Peli1 is predominantly involved in  
267 CNS neuroinflammation during WNV infection based on the following facts: First, although Peli1  
268 promotes WNV replication in myeloid cells (macrophages and DCs), it also positively regulates  
269 antiviral innate immune responses in these cells, which compromise its overall pathogenic  
270 effects in the periphery. Second, compared to myeloid cells, Peli1 expression is highly enriched  
271 in CNS resident cells and is even upregulated following WNV infection. Third, Peli1 facilitates  
272 WNV replication in microglia and neurons, especially in the latter which are the major cells  
273 infected during in vivo challenge. It also positively mediates NF-KB and /or p38MAPK activation  
274 in these cells, and boosts a robust inflammatory cytokine and chemokine production, which  
275 attracts more inflammatory cells infiltrated from the periphery and ultimately contributes to lethal  
276 WNV encephalitis. Thus, Peli1 synergistically promotes virus dissemination and inflammation in  
277 the CNS. Lastly, *Peli1*<sup>-/-</sup> mice displayed similar levels of resistance compared to WT mice  
278 following systemic and direct intracranial WNV infection. This further indicates that Peli1  
279 promotes WNV- induced pathology primarily in the CNS.

280 WNV-induced CNS disease is partially caused by bystander damage from both the  
281 immune response induced in the CNS residential cells (17, 18) and by infiltrating inflammatory  
282 cells (19-23). *Peli1*<sup>-/-</sup> mouse brains had a significantly decreased number of infiltrating CD4<sup>+</sup> T  
283 cells, activated microglia, and macrophages. Both CCL2 and CCL7 are involved in the  
284 monocytoysis and monocyte accumulation in the brain (35), whereas CXCL10 helps to recruit the  
285 antigen specific T cells (36). Microglial cells are the major producers of inflammatory cytokines  
286 and chemokines in the CNS following WNV infection (25, 37). In vitro WNV infection in *Peli1*<sup>-/-</sup>  
287 or Peli1- depleted mouse and human microglia resulted in a lower viral load and induced an

288 impaired production of IL-6, CCL2, CCL7, and CXCL10. Neurons are the primary targets during  
289 in vivo WNV replication in the CNS (18, 38). WNV passaged in *Peli1*<sup>-/-</sup> neurons induced  
290 similarly lower levels of p38MAPK phosphorylation in WT microglia, and this was accompanied  
291 by impaired chemokine CCL2 and CCL7, but not CXCL10 production in these cells. Collectively,  
292 our results suggest that Peli1 mediates proinflammatory cytokine and chemokine production  
293 predominantly via facilitating WNV replication in neural cells (microglia and neurons), which  
294 ultimately leads to macrophages/monocytes and T cell infiltration into the CNS.

295 In line with findings in a previous report (37), we did not note significant induction of  
296 inflammatory cytokine responses in human neurons following WNV infection. Interestingly, WNV  
297 induced higher *Peli1* expression on mouse neurons than on microglia. WNV-infected *Peli1*<sup>-/-</sup>  
298 mouse neurons had reduced levels of NF- $\kappa$ B and p38MAPK activation accompanied by an  
299 impaired production of inflammatory cytokines and chemokines. It was also noted that non-  
300 infected *Peli1*<sup>-/-</sup> mouse neurons also had lower levels p38MAPK activation despite of normal  
301 basal levels of cytokine production compared to WT controls (data not shown). Thus, it is likely  
302 Peli1-positively regulates inflammatory cytokine and chemokine responses in WNV-infected  
303 mouse neurons via activation of NF- $\kappa$ B. Peli1 is known to activate NF-KB signaling via  
304 interaction with RIPK1. RIPK3, another RIPK family member was recently shown to mediate  
305 neuronal chemokine induction and recruit T lymphocytes and inflammatory myeloid cells in the  
306 CNS (39). Whether Peli1 interacts with RIPK3 and regulates inflammatory responses remains  
307 to be investigated.

308 Smad6 and Smad7 are critical mediators for effective TGF- $\beta$ 1-mediated suppression of  
309 IL-1R/TLR signaling, by simultaneous binding to discrete regions of Peli1 (40). Smaducin-6,  
310 which is composed of amino acids 422-441 of Smad6, has been reported to disrupt the  
311 formation of IRAK1-, RIP1-, and IKK $\epsilon$ -, mediated TRIF signaling complexes, but not  
312 phosphorylation of p38MAPK in macrophages (34). Smaducin6 did not inhibit WNV replication

313 in microglia or macrophages. Further, Smaducin-6 did not block the production of inflammatory  
314 cytokines and chemokines in WNV-infected microglia and macrophages. These results support  
315 a role of Peli1 in induction of inflammatory responses in both cell types during WNV infection via  
316 promoting p38MAPK activation.

317 Consistent with the findings in myeloid and CNS resident cells, the production of type I  
318 IFNs, inflammatory cytokines, and chemokines in the blood and CNS tissues were all impaired  
319 in WNV-infected *Peli1*<sup>-/-</sup> mice. Our results suggest a role of Peli1 as a positive regulator of  
320 innate immunity. There are conflicting reports on the role of Peli1 in induction of type I IFN  
321 response during viral infection. For example, Xiao *et al.* found that Peli1 negatively regulates  
322 IFN signaling in microglia and macrophages during vascular stomatitis virus infection in the CNS  
323 (41). Another group has shown that Peli1 interacts with DEAF1 and positively regulates IFN $\beta$   
324 production following Sendai virus infection (42). While our results are in line with the latter, the  
325 main difference between ours and the previous findings is that Peli1 positively mediates immune  
326 induction predominantly via facilitating WNV entry and replication.

327 WNV life cycle includes attachment/entry, translation, RNA replication, and egress of  
328 viral particles. Although the virus relies heavily on host proteins during its life cycle (43, 44), our  
329 understanding of the molecular interactions of virus and mammalian host cells and their impacts  
330 on viral pathogenesis is currently limited. Previous RNA interference screening of human genes  
331 responsible for interaction with WNV proteins identified the Ub ligase CBLL1 as being critical for  
332 WNV internalization during in vitro infection (45). Several host factors, including AXL and TIM1  
333 have been shown to be involved in flavivirus replication from in vitro cell culture studies.  
334 However, their roles remain to be confirmed in vivo (46-48). In this study, by using both in vivo  
335 and in vitro models, we have identified Peli1 as a novel host factor required for WNV initial cell  
336 attachment, and entry, a process which further promotes TLR-mediated inflammatory responses  
337 in mouse and human neural cells. Interestingly, the size of the virions generated after  
338 passaging WT WNV once in *Peli1*<sup>-/-</sup> cells was reduced significantly. No genetic changes were

339 noted in the passaged viruses (data not shown). However, the reduction of virion size is likely  
340 due to an altered protein composition or changes on the ratio of viral proteins in the virions  
341 during virus assembly (49). In particular, the smaller viral particles produced in *Peli1*<sup>-/-</sup> cells are  
342 consistent with the size of recombinant subviral particles assembled in the endoplasmic  
343 reticulum during flavivirus infection in mammalian cells reported previously (50). The subviral  
344 particles consist of the pre-membrane (PrM)-E structural proteins, retain functional properties  
345 and are transported from the endoplasmic reticulum through the secretory pathways to undergo  
346 cleavage maturation by the cellular protease furin. Mutation of the furin recognition site of PrM  
347 of tick-borne encephalitis virus resulted in secretion of the smaller subviral particles. Altogether,  
348 our data suggest that *Peli1* is involved in WNV attachment, entry and assembly. The smaller  
349 virions generated *Peli1*<sup>-/-</sup> cells had reduced replication rates in WT cells and triggered  
350 attenuated inflammatory responses in these cells which contribute to a higher resistance in WT  
351 mice. These results further support our hypothesis that *Peli1* mediates inflammatory responses  
352 and promotes WNV encephalitis via facilitating virus replication. Consistent with our findings in  
353 the murine model, we also demonstrate *Peli1* expression is associated with WNV infection and  
354 inflammatory cell activation in acute post-mortem WNV encephalitis patient hippocampal  
355 tissues. Results from this study provide us with a better understanding of the mechanisms by  
356 which WNV induce lethal encephalitis. They will ultimately help to identify therapeutic targets for  
357 intervention, such as *Peli1* as a new strategy for development of the inhibitors of virus  
358 replication to prevent and treat WNV-induced encephalitis. Lastly, *Peli1* is expressed on many  
359 cell types and is highly enriched in the CNS tissues. Future investigation will be needed to  
360 determine the role of *Peli1* in other virus models, in particular the neurotropic flaviviruses.  
361  
362

363 **METHODS**

364 **Mice:** 5-8-week-old C57BL/6 (B6) mice were purchased from the Jackson Laboratory.  
365 *Peli1<sup>-/-</sup>* mice (on a B6 background) (2, 51) were bred at the University of Texas Medical Branch  
366 (UTMB). Both female and male mice were used in this study and were age- and sex- matched.  
367 Mice were inoculated intraperitoneally (i.p.) with 100 FFU of WNV 385-99 (52, 53) or WNV 385-  
368 99 passage once in WT and *Peli1<sup>-/-</sup>* macrophages. In some experiments, mice were challenged  
369 intracranially (i.c.) with 5 FFU of WNV 385-99.

370 **Cells:** Bone marrow (BM)-derived dendritic cell (DC)s, macrophages, and primary  
371 microglia cultures were isolated as described previously (2, 54). Neurons were generated  
372 according to (55) with slight modifications. After the dissection and dissociation of cortices of  
373 mouse embryos (E18.5), cells were enriched using a mouse neuron isolation kit (Miltenyi  
374 Biotec) and cultured for 5 days in neurobasal medium containing B-27 supplement (Invitrogen).  
375 BV2 cells were kindly provided by Dr. A Cardona (University of Texas San Antonio). BM-DCs or  
376 macrophages, microglia, and BV2 cells were infected with WNV at a MOI of 0.1, or 0.02 and  
377 neurons were infected at a MOI of 0.003. SH-SY5Y cells were cultured in F12K medium and  
378 EMEM (Invitrogen) and seeded in the 6-well plate for 1 day, then replaced with fresh medium  
379 with 30 uM Retinoic acid 1% (Sigma) and B27 Supplements (Gibco, 17504) for 5 days, the cells  
380 were differentiated to neurons. Smaducin-6 or Pal-Scram peptides (34) were purchased from  
381 Sigma-Aldrich and used at 100 nm 1 h after infection. Supernatants and cells were harvested at  
382 24 h and 96 h pi to measure viral load and cytokine production. **In some experiments, WT and**  
383 ***Peli1<sup>-/-</sup>* macrophages or neurons were infected with WNV 385-99. Culture supernatants were**  
384 **then harvested at day 4 for virus titration by FFA. Equal titers of viruses from WT and *Peli1<sup>-/-</sup>***  
385 **culture were subsequently used for in vivo and in vitro infection studies.**

386 **FFA:** Vero cells were incubated with sample dilutions for 1 h. A semi-solid overlay  
387 containing 0.8% methylcellulose (Sigma-Aldrich), 3% fetal bovine serum, 1% Penicillin-  
388 Streptomycin, and 1% L-glutamine was added. At 48 h, the semisolid overlay was removed,



389 cells were washed, and fixed with 1:1 of acetone: methanol solution for at least 30 min at -20°C.  
390 Cells were next subjected to immunohistochemical staining with a rabbit WNV polyclonal  
391 antibody (the World Reference Center for Emerging Viruses and Arboviruses (WRCEVA),  
392 T35502) followed by goat anti-rabbit HRP-conjugated IgG (KPL, 474-1516) for 1 h. Cells were  
393 next incubated with a peroxidase substrate (Vector Laboratories) until color developed. The  
394 number of foci was used to calculate viral titers.

395 **qPCR:** Samples were re-suspended in Trizol (Invitrogen) for RNA extraction. cDNA was  
396 synthesized by using a qScript cDNA synthesis kit (Bio-Rad). The sequences of the primer sets  
397 for WNV envelope (*Wnve*), *Peli1*, *Peli2*, *Peli3*, and cytokines cDNA and PCR reaction conditions  
398 were described previously (2, 25, 36, 53, 56). The assay was performed in the CFX96 real-time  
399 PCR system (Bio-Rad). Gene expression was calculated based on  $C_t$  values by using the  
400 formula  $2^{-[C_t(\text{target gene}) - C_t(\text{GAPDH or } \beta\text{-actin})]}$  (53).

401 **Viral attachment and entry assays:** BM-macrophages were incubated with WNV (MOI  
402 of 3 or 10) at 4°C for 1 h, allowing the virus to attach to the cell surface. After 1 h incubation,  
403 infected cells were washed three times with cold PBS to remove unbound virions. Cell surface-  
404 associated viruses were removed by washing with cold alkaline-high-salt solution (1 M NaCl and  
405 50 mM sodium bicarbonate, pH 9.5). After twice cold-PBS washes, the cells were harvested,  
406 and suspended in 3 ml DMEM medium containing 2% FBS. Total cells were collected by  
407 centrifugation at 1,000 × g for 5 min. The cell pellets were resuspended in Trizol for RNA  
408 extraction to measure viral titer by qPCR. Some cells were further incubated at 37°C to initiate  
409 viral entry. At 1.5 h and 5 h pi, the infected cells were stringently washed to remove free virus as  
410 well as cell surface-associated virus, and the intracellular viral RNA was quantified by qPCR.

411 **Transmission electron microscopy (TEM):** Cells were washed with ice cold PBS and  
412 incubated on ice for 15 min before exposure to WNV (MOI= 10) for 1 h. Cells were then rinsed  
413 with ice cold PBS, resuspended in pre-warmed media and incubated at 37°C. At 0 h, 5 min, and

414 10 h pi, cells were pelleted and fixed for at least 1 h in a mixture of 2.5% formaldehyde and  
415 0.1% glutaraldehyde in 0.05 M cacodylate buffer (pH 7.3) to which 0.01% picric acid and 0.03%  
416  $\text{CaCl}_2$  were added (EM fixative). The pellets were washed in 0.1 M cacodylate buffer followed  
417 by post-fixation in 1%  $\text{OsO}_4$  in 0.1M cacodylate buffer for 1 h, washed and *en bloc* stained with  
418 2% aqueous uranyl acetate for 20 min at 60°C. The pellets were next dehydrated in ethanol,  
419 processed through propylene oxide, and embedded in Poly/Bed 812 (Polysciences). Sections  
420 were cut on Leica EM UC7 ultramicrotome (Leica Microsystems), stained with lead citrate, and  
421 examined in a Philips CM-100 transmission electron microscope at 60 kV. Images were  
422 acquired with a Gatan Orius SC200 digital camera. In some experiments, supernatants of  
423 WNV-infected cells were concentrated at day 4 pi using a 3 kD spin columns (Sartoris,  
424 Germany). The concentrated supernatants were centrifuged for 10 min at 3000 xg to remove  
425 debris. Next, nickel grids were incubated with clarified supernatants for 10 min followed by  
426 glutaraldehyde fixation and 2% uranyl acetate staining. Micrographs were taken using a CM100  
427 transmission electron microscope (Philips).

428 **Flow cytometry:** Brain leukocytes were isolated as described before (20) and were  
429 stained with antibodies for cell surface markers, including CD3 (eBioscience, clone 145-2C11),  
430 CD4 (eBioscience, clone GK1.5), CD8 (eBioscience, clone 53-6.7), CD11b (eBioscience, clone  
431 M1/70, Gr-1-(eBioscience, clone RB6-8C5) and CD45 (BD Biosciences, clone 30-F11), fixed  
432 with 1% paraformaldehyde in PBS and examined with a C6 Flow Cytometer (BD Biosciences).  
433 Dead cells were excluded on the basis of forward and side light scatter.

434 **Western blot:** Protein was dissolved in 1X SDS loading buffer, separated on SDS-  
435 PAGE gels, electroblotted onto nitrocellulose membranes, probed with primary and secondary  
436 antibodies, and detected using the enhanced chemiluminescence (ECL) system (Pierce). The  
437 primary antibodies against phospho-p38 (Thr180/Tyr182, #9211s), p38 (#9212), Phospho-NF-  
438  $\kappa\text{B}$  RelA (Ser 468, #3039) and NF- $\kappa\text{B}$  (#3034) were from Cell Signaling Technology (Beverly)  
439 and mouse monoclonal anti- $\beta$ -actin (Sigma-Aldrich, clone AC-15) was used as a loading control.

440 **Histology:** Mice were transcardially perfused with PBS. Brains and spleens were  
441 removed and placed in 4% paraformaldehyde (PFA) for 3 days at 4°C, followed by 70% ethanol  
442 before embedding in optimal cutting temperature compound. H & E staining was performed at  
443 the Histopathology Laboratory Core at Baylor College of Medicine.

444 **Immunohistochemistry:** Human paraffin-embedded hippocampal tissues were  
445 obtained from fatal WNV encephalitis cases (generously provided by Dr. Beth Levy at St. Louis  
446 University, St. Louis, MO) and control post-mortem cases from patients without neurologic  
447 diseases (St. Louis, MO). Sections were deparaffinized in Xylene, rehydrated in serial dilutions  
448 of ethanol and boiled in citrate buffer (pH 6.0) for 30 min for antigen retrieval. Next, they were  
449 incubated for 2 h at room temperature in blocking solution (10% serum and .2% Tween 20 in  
450 PBS) to permeabilize and block nonspecific binding. This was followed by incubating with  
451 primary antibodies for Peli1 (Santa Cruz Biotechnology, sc-271065, 1:50), WNV antigen (UTMB  
452 WRCEVA, T35502, 1:500) and NeuN (Millipore, clone A60, 1:20) or isotype matched IgG in  
453 PBS supplemented with 10% serum O/N at 4°C. After washing, sections were incubated for 1 h  
454 at room temperature with fluorescently conjugated secondary antibodies (Life Technologies,  
455 1:500). Autofluorescence was darkened using .5% Sudan Black B (diluted in 70% Ethanol)  
456 incubated for 10 min. After washing, nuclei were counterstained with Dapi and coverslips were  
457 applied with ProLong™ Gold Antifade Mountant (ThermoFisher Scientific). Immunofluorescence  
458 was captured using a Zeiss LSM 510 laser-scanning confocal microscope.

459 **Statistics:** Survival curve comparisons were performed using Prism software  
460 (GraphPad) statistical analysis, which uses the log rank test. Values for viral burden, cytokine  
461 production, and antibody and T cell responses experiments were presented as means ± SEM.

462 *P values of these experiments were calculated with a non-paired 2-tailed Student's t test.*

463 *Statistical significance was accepted at  $P < 0.05$ .*

464 **Study approval:** All experiments were performed in compliance with and under the  
465 approval of the Animal Care and Use Committee at UTMB.

466 **AUTHOR CONTRIBUTION**

467 H.L., E.R.W., S.C., P.W., W.Z., S.J.T, P.V.A., and T.W. designed the experiments. E.R.W., H.L.,  
468 E.M., J.A. S., W.R., L.L.V., S.Z., J.G., N.E.B., C.C., G.X., G.L., R.T., V.L.P., and T.W. performed  
469 the experiments. E.R.W., H.L., E.M., J.A.S., S.Z., B.H.P., C.C., V.L.P., W.Z., R.S.K., P.V.A., and  
470 T.W. analyzed the data. S.C., S.P.Y., W.Z., and S.C.S. provided key reagents. H.L., E.R.W.,  
471 J.A.S., P.W., R.S.K., P.V.A. and T.W. wrote the manuscript.

472

473 **ACKNOWLEDGEMENTS**

474 This work was supported in part by the Institute for Human Infections & Immunity at UTMB  
475 (T.W.), NIH grants R01 AI099123 (T.W.), R01 AI27744 (T.W.), R01NS079166 (S.J.T),  
476 R01NS095747 (S.J.T), R01DA036165 (S.J.T), U19 AI083019 (R.S.K.) and R01 NS052632  
477 (R.S.K.), and R01 EY022694 and R01 EY026629 (W.Z.). J.A.S was supported by NIH grant  
478 F31 AI124662-01. P.V.A and V.P were partially supported by NIH grant R24 AI120942. We  
479 thank Texas A&M Institute for Genomic Medicine for *Peli1*<sup>-/-</sup> mice, Dr. A Cardona from the  
480 University of Texas San Antonio and Dr. Partha Sarkar from UTMB for BV2 cells and SHSY-5Y  
481 cells, Dr. Beth Levy for human post-mortem hippocampal tissues, Ms. Lan Pang for technique  
482 support, and Dr. Linsey Yeager for assisting in manuscript preparation.

483

484 **COMPETING FINANCIAL INTERESTS**

485 The authors declare no competing financial interests.

486

487

488 **REFERENCES:**

- 489 1. Chang M, Jin W, and Sun SC. Peli1 facilitates TRIF-dependent Toll-like receptor  
490 signaling and proinflammatory cytokine production. *Nat Immunol.* 2009;10(10):1089-95.
- 491 2. Xiao Y, Jin J, Chang M, Chang JH, Hu H, Zhou X, et al. Peli1 promotes microglia-  
492 mediated CNS inflammation by regulating Traf3 degradation. *Nat Med.* 2013;19(5):595-  
493 602.
- 494 3. Chang M, Jin W, Chang JH, Xiao Y, Brittain GC, Yu J, et al. The ubiquitin ligase Peli1  
495 negatively regulates T cell activation and prevents autoimmunity. *Nat Immunol.*  
496 2011;12(10):1002-9.
- 497 4. Park HY, Go H, Song HR, Kim S, Ha GH, Jeon YK, et al. Pellino 1 promotes  
498 lymphomagenesis by deregulating BCL6 polyubiquitination. *The Journal of clinical*  
499 *investigation.* 2014;124(11):4976-88.
- 500 5. Laboratory-acquired West Nile virus infections--United States, 2002. *MMWR Morb*  
501 *Mortal Wkly Rep.* 2002;51(50):1133-5.
- 502 6. Charatan F. Organ transplants and blood transfusions may transmit West Nile virus.  
503 *Bmj.* 2002;325(7364):566.
- 504 7. Petersen LR, Brault AC, and Nasci RS. West Nile Virus: Review of the Literature. *JAMA.*  
505 2013;310(3):308-15.
- 506 8. Carson PJ, Konewko P, Wold KS, Mariani P, Goli S, Bergloff P, et al. Long-term clinical  
507 and neuropsychological outcomes of West Nile virus infection. *Clin Infect Dis.*  
508 2006;43(6):723-30.
- 509 9. Ou AC, and Ratard RC. One-year sequelae in patients with West Nile Virus encephalitis  
510 and meningitis in Louisiana. *J La State Med Soc.* 2005;157(1):42-6.
- 511 10. Cook RL, Xu X, Yablonsky EJ, Sakata N, Tripp JH, Hess R, et al. Demographic and  
512 clinical factors associated with persistent symptoms after West Nile virus infection. *Am J*  
513 *Trop Med Hyg.* 2010;83(5):1133-6.

- 514 11. Sadek JR, Pergam SA, Harrington JA, Echevarria LA, Davis LE, Goade D, et al.  
515 Persistent neuropsychological impairment associated with West Nile virus infection. *J*  
516 *Clin Exp Neuropsychol.* 2010;32(1):81-7.
- 517 12. Nolan MS, Podoll AS, Hause AM, Akers KM, Finkel KW, and Murray KO. Prevalence of  
518 chronic kidney disease and progression of disease over time among patients enrolled in  
519 the Houston West Nile virus cohort. *PLoS One.* 2012;7(7):e40374.
- 520 13. Patel H, Sander B, and Nelder MP. Long-term sequelae of West Nile virus-related  
521 illness: a systematic review. *The Lancet Infectious Diseases.*15(8):951-9.
- 522 14. Sejvar JJ. Clinical Manifestations and Outcomes of West Nile Virus Infection. *Viruses.*  
523 2014;6(2):606-23.
- 524 15. Weatherhead JE, Miller VE, Garcia MN, Hasbun R, Salazar L, Dimachkie MM, et al.  
525 Long-Term Neurological Outcomes in West Nile Virus–Infected Patients: An  
526 Observational Study. *The American Journal of Tropical Medicine and Hygiene.*  
527 2015;92(5):1006-12.
- 528 16. Anastasiadou A, Kakoulidis I, Butel D, Kehagia E, and Papa A. Follow-up study of Greek  
529 patients with West Nile virus neuroinvasive disease. *Int J Infect Dis.* 2013;17(7):e494-7.
- 530 17. Quick ED, Leser JS, Clarke P, and Tyler KL. Activation of intrinsic immune responses  
531 and microglial phagocytosis in an ex vivo spinal cord slice culture model of West Nile  
532 virus infection. *Journal of virology.* 2014;88(22):13005-14.
- 533 18. Shrestha B, Gottlieb D, and Diamond MS. Infection and injury of neurons by West Nile  
534 encephalitis virus. *J Virol.* 2003;77(24):13203-13.
- 535 19. Brehin AC, Mouries J, Frenkiel MP, Dadaglio G, Despres P, Lafon M, et al. Dynamics of  
536 immune cell recruitment during West Nile encephalitis and identification of a new  
537 CD19+B220-BST-2+ leukocyte population. *J Immunol.* 2008;180(10):6760-7.

- 538 20. Glass WG, Lim JK, Cholera R, Pletnev AG, Gao JL, and Murphy PM. Chemokine  
539 receptor CCR5 promotes leukocyte trafficking to the brain and survival in West Nile virus  
540 infection. *J Exp Med.* 2005;202(8):1087-98.
- 541 21. Lim JK, Obara CJ, Rivollier A, Pletnev AG, Kelsall BL, and Murphy PM. Chemokine  
542 receptor Ccr2 is critical for monocyte accumulation and survival in West Nile virus  
543 encephalitis. *J Immunol.* 2011;186(1):471-8.
- 544 22. Sitati E, McCandless EE, Klein RS, and Diamond MS. CD40-CD40 ligand interactions  
545 promote trafficking of CD8+ T cells into the brain and protection against West Nile virus  
546 encephalitis. *Journal of virology.* 2007;81(18):9801-11.
- 547 23. Sitati EM, and Diamond MS. CD4+ T-cell responses are required for clearance of West  
548 Nile virus from the central nervous system. *Journal of virology.* 2006;80(24):12060-9.
- 549 24. Town T, Jeng D, Alexopoulou L, Tan J, and Flavell RA. Microglia recognize double-  
550 stranded RNA via TLR3. *J Immunol.* 2006;176(6):3804-12.
- 551 25. Wang T, Town T, Alexopoulou L, Anderson JF, Fikrig E, and Flavell RA. Toll-like  
552 receptor 3 mediates West Nile virus entry into the brain causing lethal encephalitis. *Nat*  
553 *Med.* 2004;10(12):1366-73.
- 554 26. Vasek MJ, Garber C, Dorsey D, Durrant DM, Bollman B, Soung A, et al. A complement-  
555 microglial axis drives synapse loss during virus-induced memory impairment. *Nature.*  
556 2016;534(7608):538-43.
- 557 27. Lazear HM, Lancaster A, Wilkins C, Suthar MS, Huang A, Vick SC, et al. IRF-3, IRF-5,  
558 and IRF-7 coordinately regulate the type I IFN response in myeloid dendritic cells  
559 downstream of MAVS signaling. *PLoS Pathog.* 2013;9(1):e1003118.
- 560 28. Mukhopadhyay S, Kim BS, Chipman PR, Rossmann MG, and Kuhn RJ. Structure of  
561 West Nile virus. *Science.* 2003;302(5643):248.

- 562 29. Fredericksen BL, and Gale M, Jr. West Nile virus evades activation of interferon  
563 regulatory factor 3 through RIG-I-dependent and -independent pathways without  
564 antagonizing host defense signaling. *Journal of virology*. 2006;80(6):2913-23.
- 565 30. Daffis S, Samuel MA, Suthar MS, Gale M, Jr., and Diamond MS. Toll-like receptor 3 has  
566 a protective role against West Nile virus infection. *Journal of virology*.  
567 2008;82(21):10349-58.
- 568 31. Town T, Bai F, Wang T, Kaplan AT, Qian F, Montgomery RR, et al. Toll-like receptor 7  
569 mitigates lethal West Nile encephalitis via interleukin 23-dependent immune cell  
570 infiltration and homing. *Immunity*. 2009;30(2):242-53.
- 571 32. Kelley TW, Prayson RA, Ruiz AI, Isada CM, and Gordon SM. The neuropathology of  
572 West Nile virus meningoencephalitis. A report of two cases and review of the literature.  
573 *Am J Clin Pathol*. 2003;119(5):749-53.
- 574 33. Cho H, Proll SC, Szretter KJ, Katze MG, Gale M, Jr., and Diamond MS. Differential  
575 innate immune response programs in neuronal subtypes determine susceptibility to  
576 infection in the brain by positive-stranded RNA viruses. *Nat Med*. 2013;19(4):458-64.
- 577 34. Lee YS, Park JS, Jung SM, Kim SD, Kim JH, Lee JY, et al. Inhibition of lethal  
578 inflammatory responses through the targeting of membrane-associated Toll-like receptor  
579 4 signaling complexes with a Smad6-derived peptide. *EMBO Mol Med*. 2015;7(5):577-  
580 92.
- 581 35. Bardina SV, Michlmayr D, Hoffman KW, Obara CJ, Sum J, Charo IF, et al. Differential  
582 Roles of Chemokines CCL2 and CCL7 in Monocytosis and Leukocyte Migration during  
583 West Nile Virus Infection. *J Immunol*. 2015.
- 584 36. Klein RS, Lin E, Zhang B, Luster AD, Tollett J, Samuel MA, et al. Neuronal CXCL10  
585 directs CD8+ T-cell recruitment and control of West Nile virus encephalitis. *J Virol*.  
586 2005;79(17):11457-66.



- 587 37. Cheeran MC, Hu S, Sheng WS, Rashid A, Peterson PK, and Lokensgard JR. Differential  
588 responses of human brain cells to West Nile virus infection. *J Neurovirol.*  
589 2005;11(6):512-24.
- 590 38. Sampson BA, Ambrosi C, Charlot A, Reiber K, Veress JF, and Armbrustmacher V. The  
591 pathology of human West Nile Virus infection. *Hum Pathol.* 2000;31(5):527-31.
- 592 39. Daniels BP, Snyder AG, Olsen TM, Orozco S, Oguin TH, 3rd, Tait SW, et al. RIPK3  
593 Restricts Viral Pathogenesis via Cell Death-Independent Neuroinflammation. *Cell.*  
594 2017;169(2):301-13 e11.
- 595 40. Lee YS, Kim JH, Kim ST, Kwon JY, Hong S, Kim SJ, et al. Smad7 and Smad6 bind to  
596 discrete regions of Pellino-1 via their MH2 domains to mediate TGF-beta1-induced  
597 negative regulation of IL-1R/TLR signaling. *Biochemical and biophysical research  
598 communications.* 2010;393(4):836-43.
- 599 41. Xiao Y, Jin J, Zou Q, Hu H, Cheng X, and Sun SC. Peli1 negatively regulates type I  
600 interferon induction and antiviral immunity in the CNS. *Cell Biosci.* 2015;5:34.
- 601 42. Ordureau A, Enesa K, Nanda S, Le Francois B, Peggie M, Prescott A, et al. DEAF1 is a  
602 Pellino1-interacting protein required for interferon production by Sendai virus and  
603 double-stranded RNA. *The Journal of biological chemistry.* 2013;288(34):24569-80.
- 604 43. Bidet K, and Garcia-Blanco MA. Flaviviral RNAs: weapons and targets in the war  
605 between virus and host. *Biochem J.* 2014;462(2):215-30.
- 606 44. Brinton MA. Replication cycle and molecular biology of the West Nile virus. *Viruses.*  
607 2014;6(1):13-53.
- 608 45. Krishnan MN, Ng A, Sukumaran B, Gilfoy FD, Uchil PD, Sultana H, et al. RNA  
609 interference screen for human genes associated with West Nile virus infection. *Nature.*  
610 2008;455(7210):242-5.
- 611 46. Govero J, Esakky P, Scheaffer SM, Fernandez E, Drury A, Platt DJ, et al. Zika virus  
612 infection damages the testes in mice. *Nature.* 2016;540(7633):438-42.

- 613 47. Miner JJ, Sene A, Richner JM, Smith AM, Santeford A, Ban N, et al. Zika Virus Infection  
614 in Mice Causes Panuveitis with Shedding of Virus in Tears. *Cell Rep.* 2016;16(12):3208-  
615 18.
- 616 48. Tabata T, Petitt M, Puerta-Guardo H, Michlmayr D, Wang C, Fang-Hoover J, et al. Zika  
617 Virus Targets Different Primary Human Placental Cells, Suggesting Two Routes for  
618 Vertical Transmission. *Cell host & microbe.* 2016;20(2):155-66.
- 619 49. Xu Z, and Hobman TC. The helicase activity of DDX56 is required for its role in  
620 assembly of infectious West Nile virus particles. *Virology.* 2012;433(1):226-35.
- 621 50. Allison SL, Tao YJ, O'Riordain G, Mandl CW, Harrison SC, and Heinz FX. Two distinct  
622 size classes of immature and mature subviral particles from tick-borne encephalitis virus.  
623 *Journal of virology.* 2003;77(21):11357-66.
- 624 51. Liu HM, Jiang F, Loo YM, Hsu S, Hsiang TY, Marcotrigiano J, et al. Regulation of  
625 Retinoic Acid Inducible Gene-I (RIG-I) Activation by the Histone Deacetylase 6.  
626 *EBioMedicine.* 2016;9:195-206.
- 627 52. Tesh RB, Siirin M, Guzman H, Travassos da Rosa AP, Wu X, Duan T, et al. Persistent  
628 West Nile virus infection in the golden hamster: studies on its mechanism and possible  
629 implications for other flavivirus infections. *J Infect Dis.* 2005;192(2):287-95.
- 630 53. Welte T, Aronson J, Gong B, Rachamalla A, Mendell N, Tesh R, et al. Vgamma4+ T  
631 cells regulate host immune response to West Nile virus infection. *FEMS Immunol Med*  
632 *Microbiol.* 2011;63(2):183-92.
- 633 54. Daffis S, Samuel MA, Suthar MS, Keller BC, Gale M, Jr., and Diamond MS. Interferon  
634 regulatory factor IRF-7 induces the antiviral alpha interferon response and protects  
635 against lethal West Nile virus infection. *Journal of virology.* 2008;82(17):8465-75.
- 636 55. Ru W, Peng Y, Zhong L, and Tang SJ. A role of the mammalian target of rapamycin  
637 (mTOR) in glutamate-induced down-regulation of tuberous sclerosis complex proteins 2  
638 (TSC2). *Journal of molecular neuroscience : MN.* 2012;47(2):340-5.

639 56. Lanciotti RS, Kerst AJ, Nasci RS, Godsey MS, Mitchell CJ, Savage HM, et al. Rapid  
640 detection of West Nile virus from human clinical specimens, field- collected mosquitoes,  
641 and avian samples by a TaqMan reverse transcriptase-PCR assay. *J Clin Microbiol.*  
642 2000;38(11):4066-71.

643

644

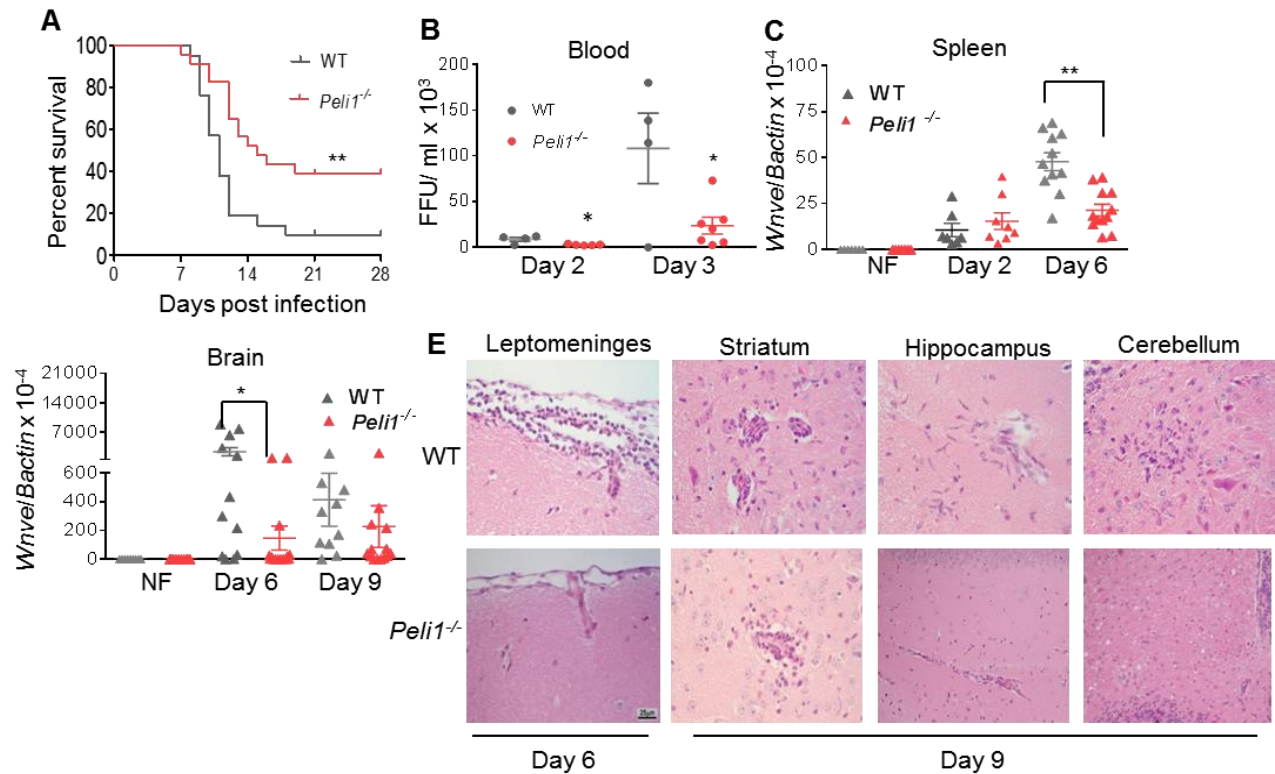

646

647

648 **Figure 1. *Peli1*<sup>-/-</sup> mice are more resistant to lethal WNV infection.** **A.** Survival of WT and  
 649 *Peli1*<sup>-/-</sup> mice after i.p. injection with WNV 385-99.  $n = 21$  and  $n = 23$  for WT and *Peli1*<sup>-/-</sup> mice  
 650 respectively.  $** P < 0.01$  compared to WT group (log rank test). **B.** Viremia was determined by  
 651 using FFA at days 2 and 3 post infection (pi). Data are presented as mean  $\pm$  SEM ( $n = 3$  to 6) of  
 652 samples collected from one representative of three similar experiments. **C-D.** Viral load in the  
 653 spleen and brain of infected and non-infected (NF) mice was determined by qPCR assay. Data  
 654 are presented as mean  $\pm$  SEM,  $n = 7$  to 12 collected from 3 independent experiments. For  
 655 Panels **B-D**,  $** P < 0.01$  or  $* P < 0.05$  compared to WT group (Unpaired t test). **E.** H & E staining.  
 656 Representative images (20X) shown are brains collected from 4 to 5 WNV-infected mice per  
 657 group at indicated time points. Scale bar: 100 $\mu$ m.  
 658

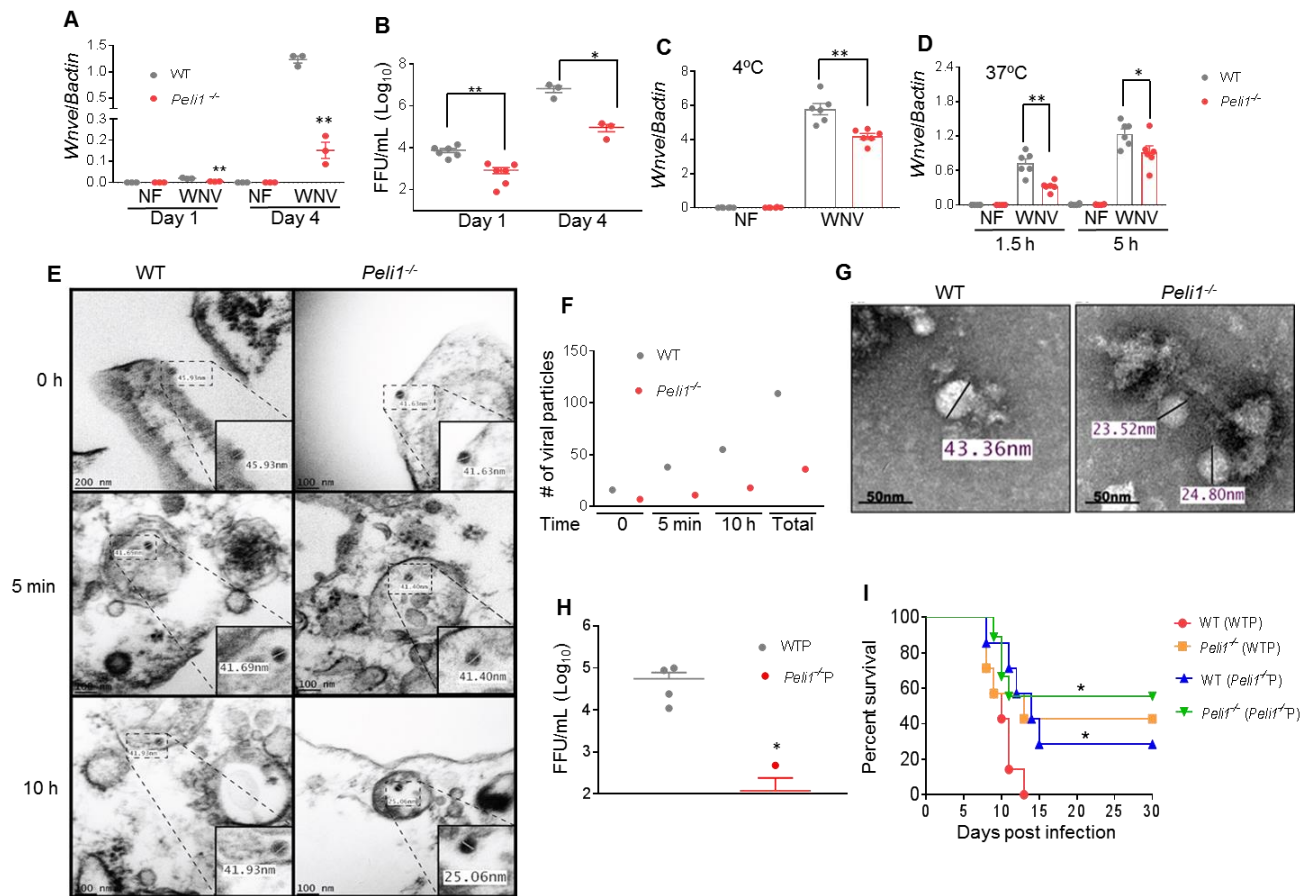

659  
 660  
 661  
 662  
 663  
 664  
 665  
 666  
 667  
 668  
 669  
 670  
 671  
 672  
 673  
 674  
 675  
 676  
 677  
 678  
 679  
 680  
 681

**Figure 2. Peli1 facilitated WNV replication in macrophages and promoted high mortality in vivo.** **A-B.** Viral load of WNV-infected macrophages was measured by qPCR (**A**) and FFA (**B**). Data shown are representative of five similar experiments and are presented as means  $\pm$  SEM,  $n = 3$  to 6. **C-D.** Macrophages were infected with WNV for 1 h at 4°C, washed and collected to measure intracellular viral RNA by qPCR in the attachment assay (**C**). For virus entry (**D**), cells were subsequently resuspended in medium and incubated at 37°C. At indicated time points, cells were washed to determine intracellular viral RNAs.  $n = 6$ . **E-F.** Thin-section transmission electron micrographs of WNV- infected macrophages. **E.** Viral particles were observed at the plasma membrane at 0 min, in small uncoated vesicles at 5 min and in double membrane vesicles at 10 h. **F.** Quantitation of 10 fields of view of ultrathin sections. **G.** Negative staining micrograph of WNV. Virions range in size from 41 nm to 47 nm and 23.5 nm to 39.5 nm in the supernatants of WT and *Peli1*<sup>-/-</sup> macrophages at day 4 pi respectively. **H.** WT macrophages were infected at MOI of 0.02 with viruses passaged in WT (WTP) and *Peli1*<sup>-/-</sup> (*Peli1*<sup>-/-</sup>P) macrophages. Viral load was measured by FFA at day 4 pi. Data shown are representative of two similar experiments and are presented as means  $\pm$  SEM,  $n = 4$ . Data in **A-D & H** were analyzed by Unpaired t test. \*\*  $P < 0.01$  or \*  $P < 0.05$  compared to WT group. **I.** Survival rate of mice i.p. injected with 100 FFU of WNV passaged in WT macrophages (WTP), and *Peli1*<sup>-/-</sup> (*Peli1*<sup>-/-</sup>P) macrophages.  $n = 7$  or 9. \*  $P < 0.05$  compared to WT mice infected with WTP (WT (WTP), Log-rank test).

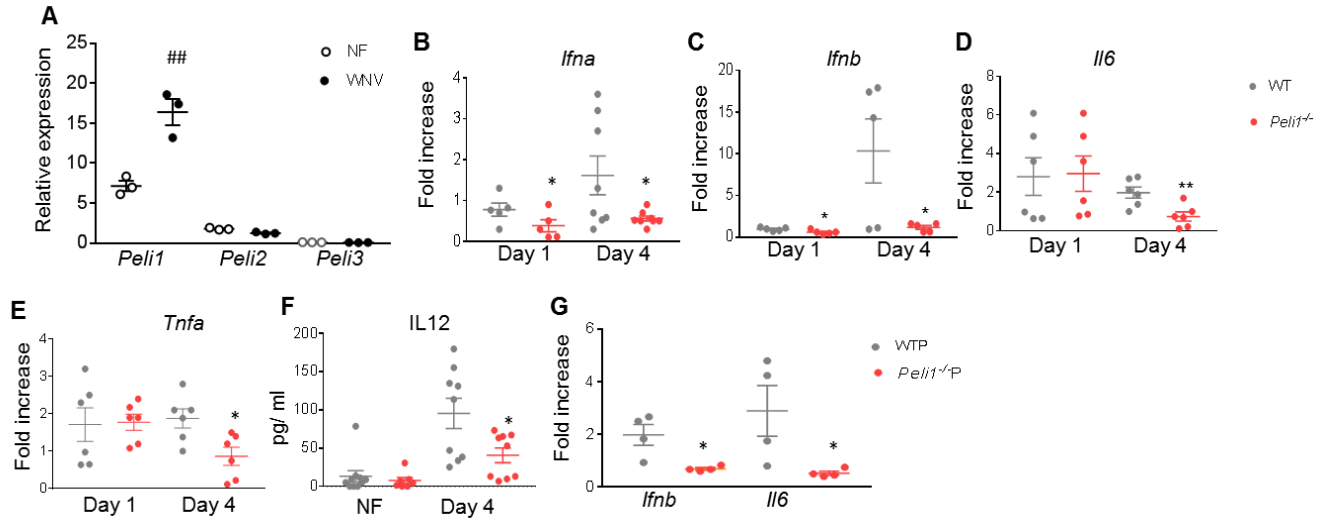

682

683

684

685

686

687

688

689

690

691

692

693

694

695

696

**Figure 3. WNV- induced antiviral immune responses in WT and *Peli1*<sup>-/-</sup> macrophages. A- F.** WT and *Peli1*<sup>-/-</sup> macrophages were infected with WNV and harvested at indicated time points. **A.** *Peli1*, *Peli2*, and *Peli3* RNA levels in WT macrophages were measured at day 4 pi. Data shown are representative of three similar experiments and are presented as means  $\pm$  SEM,  $n = 3$ . ##  $P < 0.01$  compared to non-infected (NF) group (Unpaired t test). **B- F.** Cytokine RNA or protein levels were measured at indicated time points by qPCR and Bioplex respectively. Data represent means  $\pm$  SEM of 5 to 10 samples collected from 2 independent experiments. \*\*  $P < 0.01$  or \*  $P < 0.05$  compared to WT group. **G.** WT macrophages were infected at MOI of 0.02 with WNV passaged in WT (WTP) or *Peli1*<sup>-/-</sup> (*Peli1*<sup>-/-</sup>-P) macrophages. At day 4 pi, cytokine production was determined by using qPCR. Data are presented as the fold increase compared to mock- infected (means  $\pm$  SEM) and are representative of two similar experiments,  $n = 3$  to 6 per group. \*  $P < 0.05$  compared to WTP group (Unpaired t test).

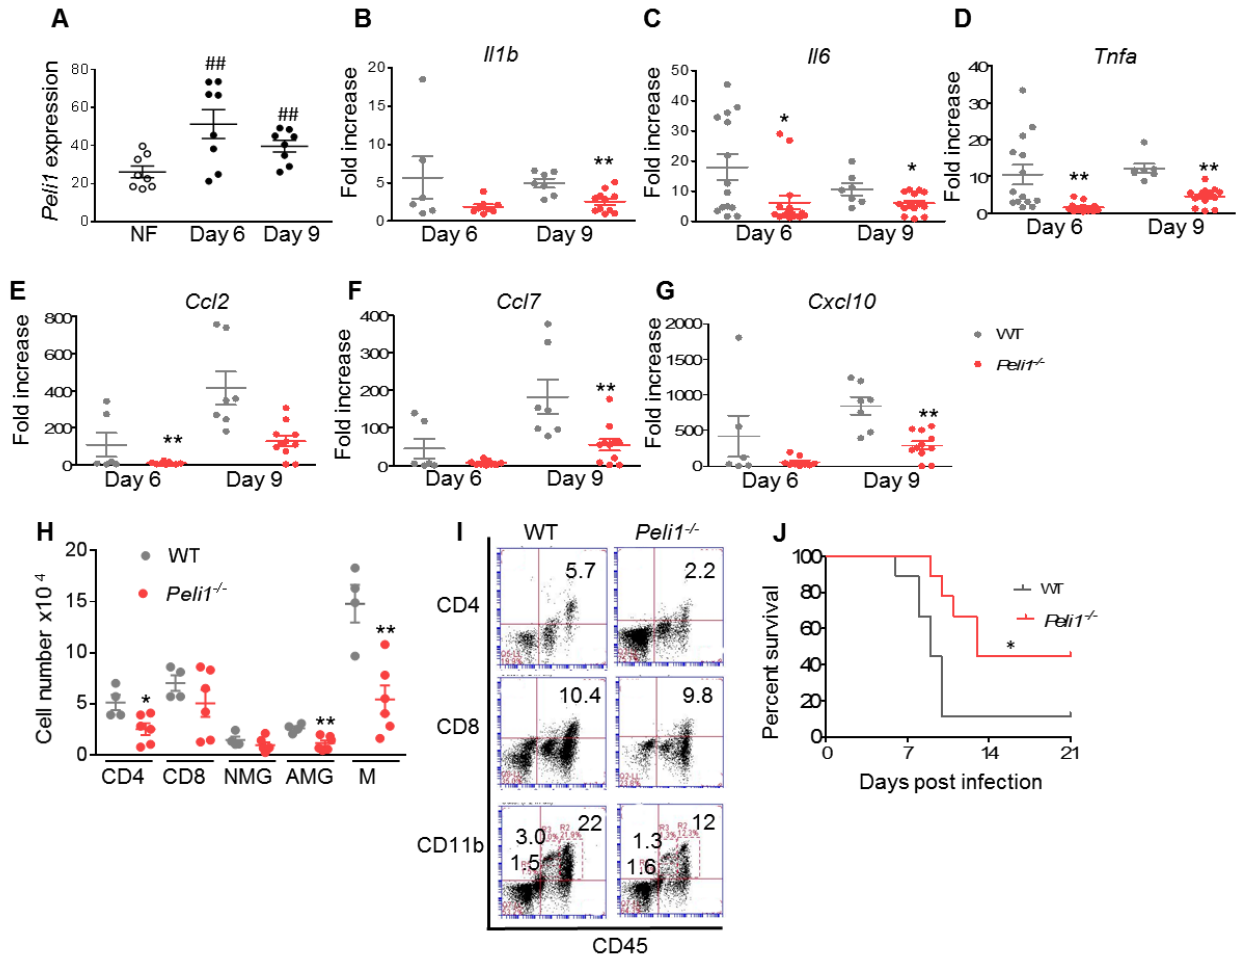

697  
698  
699  
700  
701  
702  
703  
704  
705  
706  
707  
708  
709  
710  
711  
712  
713  
714

**Figure 4. *Peli1* mediated neuroinflammation in the CNS after WNV infection.** **A.** RNA levels of *Peli1* in the brain of WT mice following WNV infection were determined by qPCR assay. Data are presented as the means  $\pm$  SEM of samples pooled from 2 to 3 independent experiments,  $n = 8$ . ##  $P < 0.01$  compared to non-infected (NF) group (Unpaired t test). **B-G.** RNA levels of cytokines and chemokines in the brain at indicated time points were determined by qPCR assay. Data are presented as the means  $\pm$  SEM of pooled 6 to 10 samples from 2 independent experiments. **H-J.** Brain leukocyte infiltration following WNV infection. **H.** The number of brain leukocytes are presented as the means  $\pm$  SEM of 9 to 10 mice from 2 independent experiments, including naïve microglia cells (NMG), activated microglial cells (AMG), macrophages (M), CD4<sup>+</sup> and CD8<sup>+</sup> T cells on day 9 pi analyzed by flow cytometry. **I.** Representative flow image is shown. For **B-G & H**, \*\*  $P < 0.01$  or \*  $P < 0.05$  compared to WT group (Unpaired t test). **J.** Survival of WT and *Peli1*<sup>-/-</sup> mice after i.c. injection with WNV 385-99.  $n = 9$  per group. \*  $P < 0.05$  compared to WT group (Log-rank test).

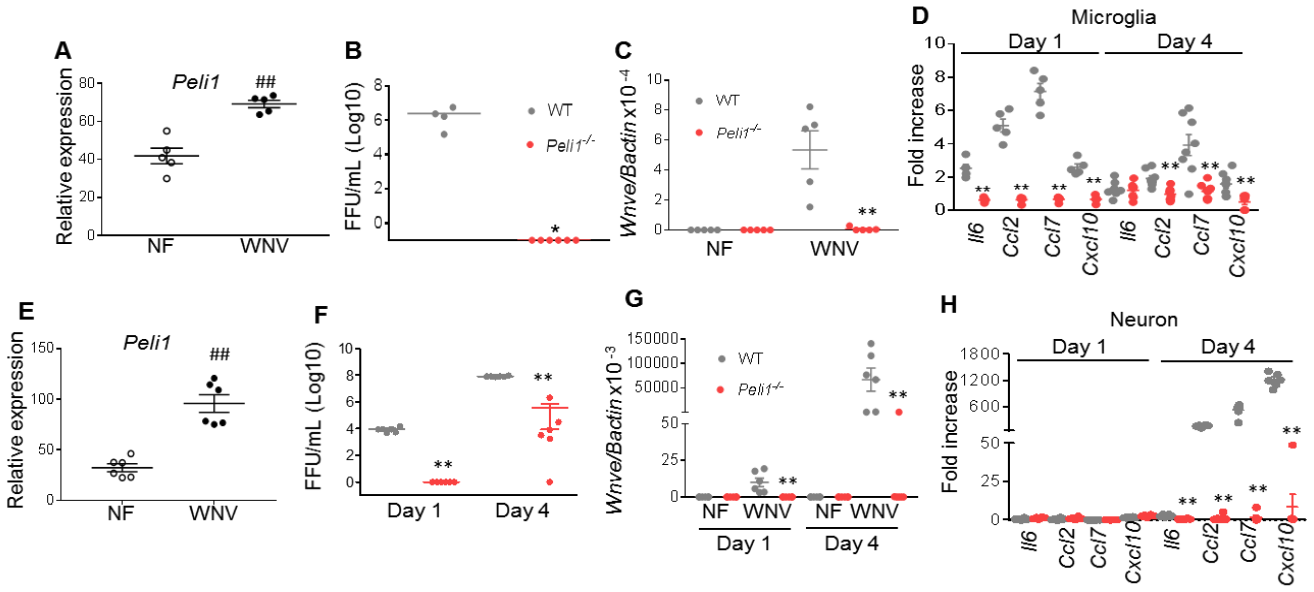

715  
716  
717 **Figure 5. WNV infection and induction of immune responses in microglia and neurons.**  
718 **A.** RNA levels of *Peli1* in WT microglia at day 4 pi were determined by qPCR assay. Data are  
719 presented as means  $\pm$  SEM and are representative of 2 independent experiments, n = 5. ##  $P <$   
720 0.01 compared to non-infected (NF) group (Unpaired t test). **B- D.** Primary microglia were  
721 infected with WNV 385-99 and harvested at indicated time points. Data are presented as the  
722 means  $\pm$  SEM of pooled 4 to 8 samples from 2 independent experiments. **B-C.** Viral load was  
723 measured at day 4. **D.** Cytokine RNA levels were measured at indicated time points by qPCR.  
724 **E- H.** Primary mouse neurons were infected with WNV 385-99 and harvested at indicated time  
725 points. Data are presented as means  $\pm$  SEM, n = 6 per group. **E.** RNA levels of *Peli1* in WT  
726 neurons at day 4 pi. ##  $P <$  0.01 compared to NF group (Unpaired t test). **F-G.** Viral load was  
727 measured at indicated time points by qPCR (**F**) and FFA (**G**). **H.** *Il6*, *Ccl2*, *Ccl7*, and *Cxcl10*  
728 RNA levels were measured at indicated time points by qPCR. For **B-D & F-H** panels \*\*  $P <$  0.01  
729 or \*  $P <$  0.05 compared to WT group (Unpaired t test).



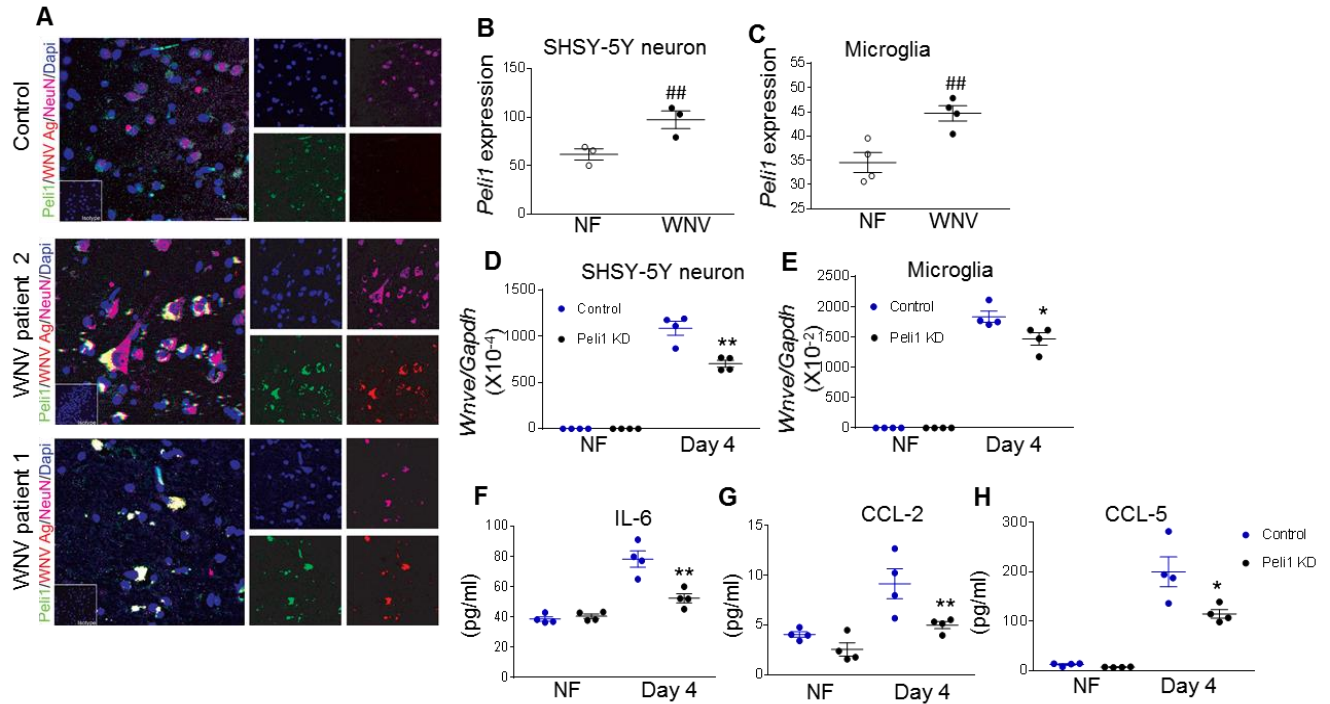

730  
731  
732  
733  
734  
735  
736  
737  
738  
739  
740  
741  
742  
743  
744  
745

**Figure 6. Peli1 expression and its role in human cells during WNV infection. A.** Immunodetection of Peli1 (green), WNV antigen (red), and NeuN (purple), in postmortem hippocampal tissues from one control (top panel) or two WNV-infected patients (middle & bottom panels). Nuclei are counterstained with DAPI (blue). Scale bar: 8  $\mu$ m. Insets: images of sections stained with isotype control antibodies or serum. **B- C.** RNA levels of *Peli1* in SH-SY5Y-derived neurons and human microglia at days 1 or 4 pi were determined by qPCR assay. Data are presented as means  $\pm$  SEM and are representative of 2 similar experiments, n =3 to 4. **##**  $P < 0.01$  compared to NF group (Unpaired t test). **D- H.** SH-SY5Y- derived neurons (**D**) or human microglial cells (**E-H**) were treated with control and Peli1 siRNA (Peli1KD), infected with WNV 385-99 at 48 h and harvested at indicated time points. **D- E.** Viral load was measured at day 4 by qPCR. **F- H.** IL-6, CCL-2, and CCL-5 production in microglial cells was measured at day 4 by Bioplex. Data are presented as means  $\pm$  SEM and are representative of 2 similar experiments, n =4. **\*\***  $P < 0.01$  or **\***  $P < 0.05$  compared to control group (Unpaired t test).

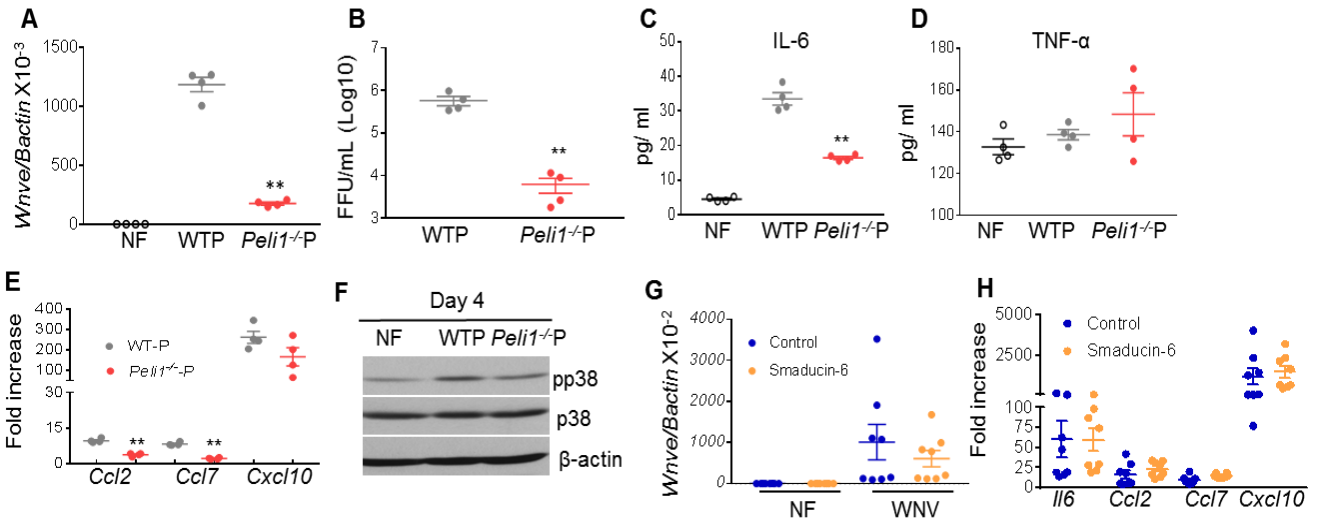

747  
748

749

**Figure 7. Peli1 promoted p38MAPK activation in microglia via facilitating WNV**

**replication. A- F.** BV2 cells were infected at MOI of 0.02 with viruses passaged in WT (WTP) and *Peli1*<sup>-/-</sup> (*Peli1*<sup>-/-</sup>P) macrophages or neurons. **A- B.** At day 4 pi, viral load was measured by qPCR (**A**) or FFA (**B**). **C- E.** IL-6 and TNF-α production and *Ccl2*, *Ccl7*, and *Cxcl10* RNA levels were measured at day 4 by Bioplex or qPCR respectively. Data are presented as means ± SEM and are representative of 2 similar experiments, n =4. **A-E,** \*\* *P* < 0.01 compared to WT group (Unpaired t test). **F.** Western blot assay for p38MAPK activation. One representative of two samples per group was shown. **G-H.** BV2 cells were infected at MOI of 0.02 with WNV 385-99 and treated with Smaducin-6 or control peptides at 1 h pi. **G.** Viral load was measured at day 4 pi by qPCR. **H.** Cytokine and chemokine levels were measured at day 4 by qPCR. Data are presented as fold increase compared to mock- infected (means ± SEM) and represent 8 samples pooled from 2 independent experiments.

760  
761

762

763

764

765

766

767

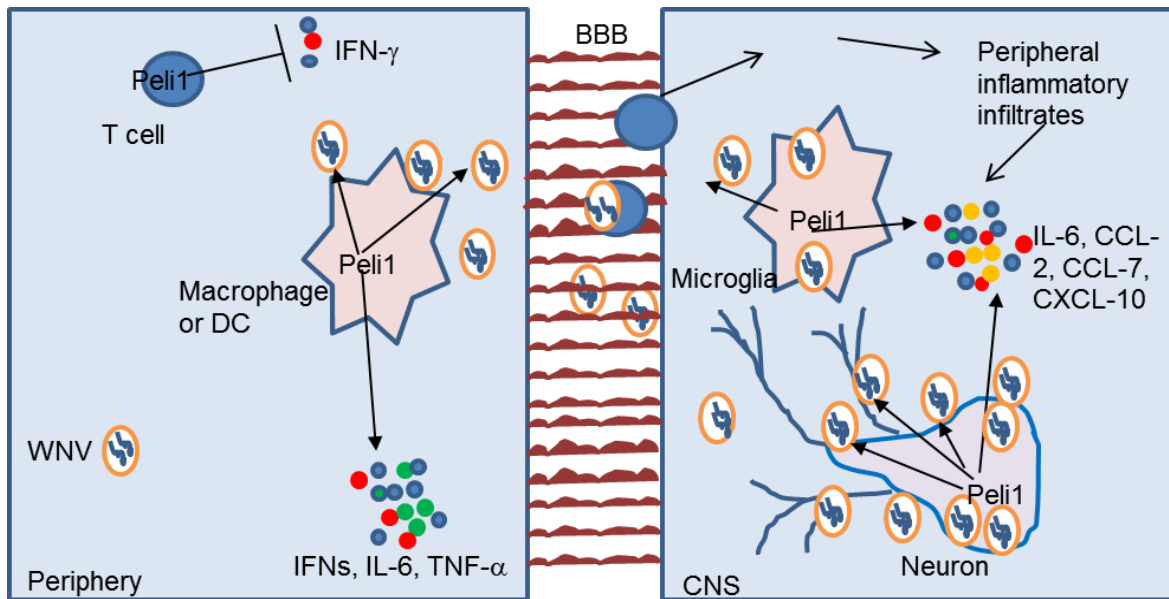

768  
 769  
 770  
 771  
 772  
 773  
 774

**Figure 8. Proposed model illustrating Peli1 promotes virus replication and neuroinflammation during WNV infection.**

775

776

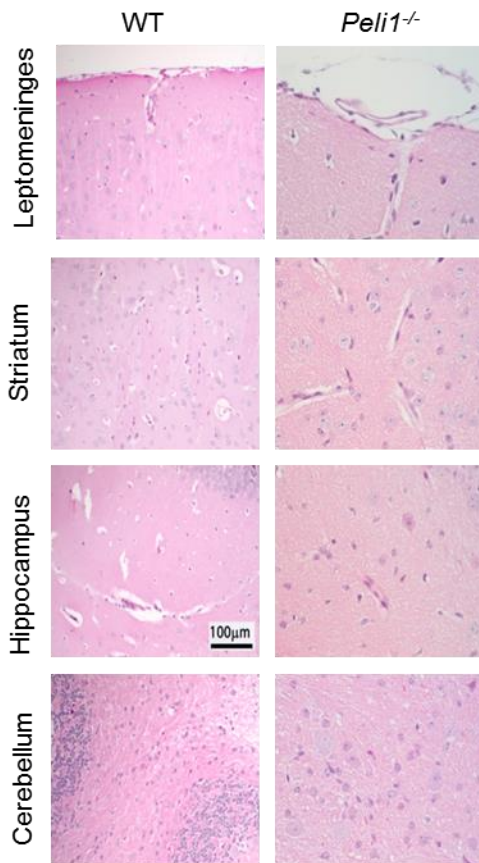

777

778

779 **Supplemental Figure 1. Histology study of WT and *Peli1*<sup>-/-</sup> mice.** Representative images  
780 (20X) shown are H&E staining of brains from non-infected WT and *Peli1*<sup>-/-</sup> mice. Samples were  
781 collected from 4 mice per group of 2 independent experiments. Scale bar: 100µm.  
782

782

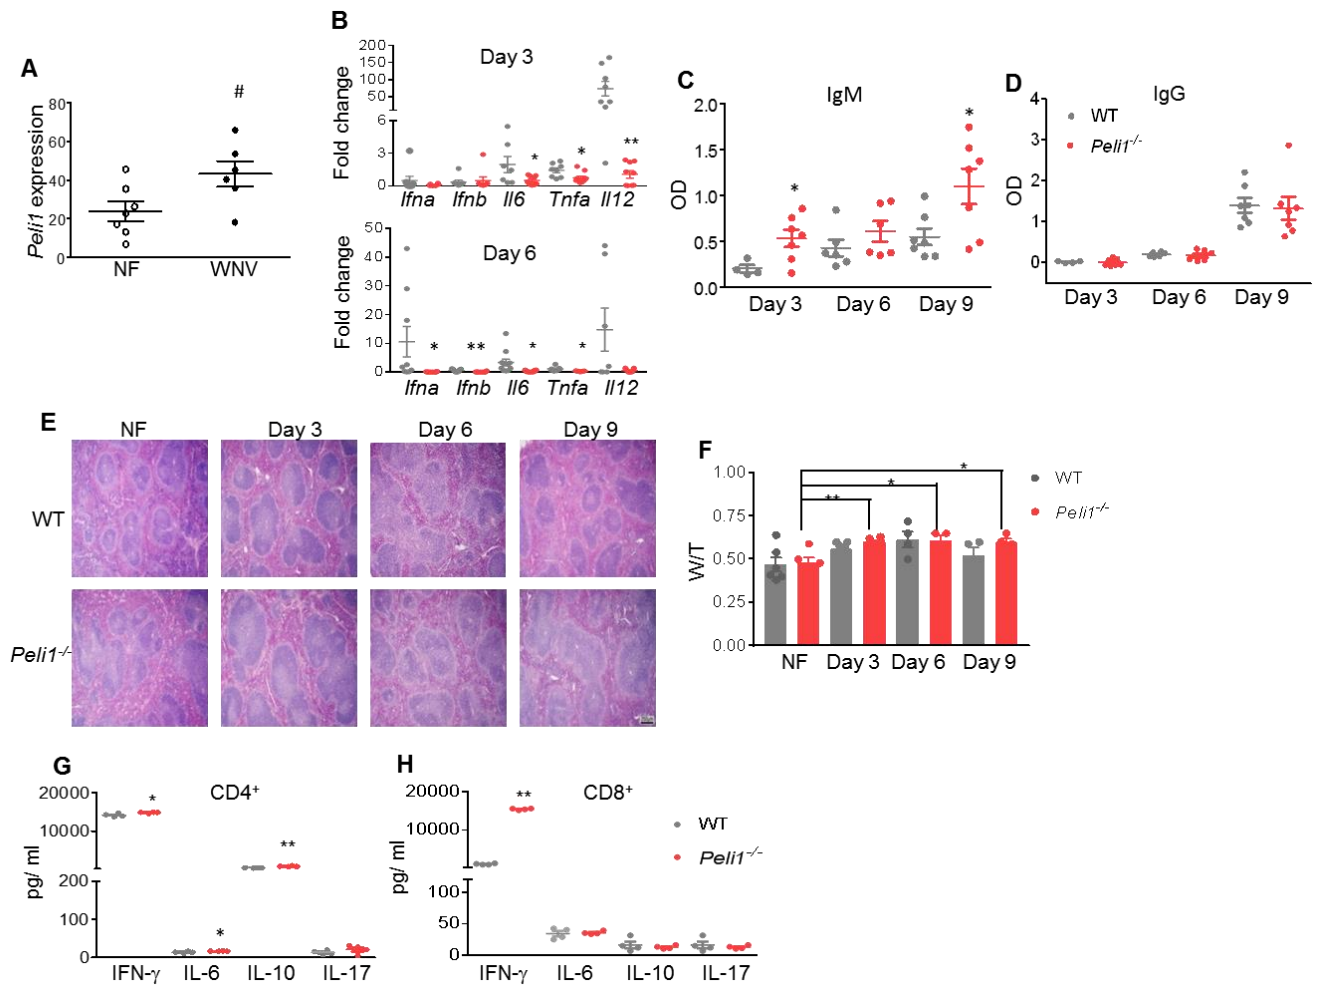

784

785

786

787

788

789

790

791

792

793

794

795

796

797

798

799

800

801

802

803

804

**Supplemental Figure 2. *Peli1*<sup>-/-</sup> mice exhibited impaired cytokine production but modestly enhanced adaptive immune responses in the periphery.** **A.** RNA levels of *Peli1* in the blood of WT mice at day 3 were determined by qPCR assay. Data represent the means  $\pm$  SEM of 6 to 7 samples from 2 independent experiments. #  $P < 0.05$  compared to non-infected (NF) group (Unpaired t test). **B.** Blood cytokines levels were determined by qPCR assay. Data are presented as the fold increase compared to NF group and represent the means  $\pm$  SEM of 6 to 11 samples from 3 independent experiments. **C- D.** The development of specific IgM (C) or IgG (D) Abs to WNV was determined using purified rWNV-E protein antigen. Data represent the means  $\pm$  SEM of 4 to 7 samples from 2 independent experiments. **E-F:** H&E staining. Representative images (20X) shown are spleens from NF and WNV-infected mice. Two photographs of different regions were taken from each spleen section at lowest magnification (2.5X objective) to cover maximal area for comparison. The white pulp area was measured, expressed in pixels, using the ImageJ program (<https://imagej.nih.gov/ij/>). Scale bar: 250 $\mu$ m. Data are presented as the ratios of white pulp-to-total area (W/T) of each group and represent the means  $\pm$  SEM,  $n = 2$  to 3. \*\*  $P < 0.01$  or \*  $P < 0.05$  compared to NF group (Unpaired t test). **G- H.** Splenocytes were harvested at day 7 pi and were cultured ex vivo with WNV peptides for 3 days, and cytokine production in culture supernatant was measured. Data represent the means  $\pm$  SEM of 4 to 7 samples from 2 independent experiments. For **B-D & G-H** panels, \*\*  $P < 0.01$  or \*  $P < 0.05$  compared to WT group (Unpaired t test).

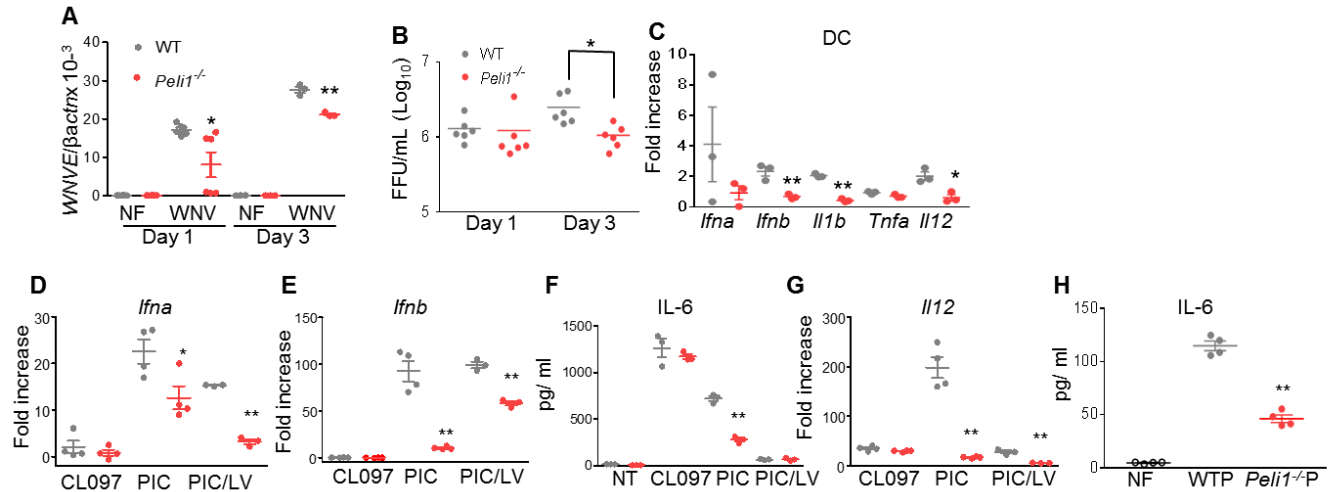

805  
806  
807  
808  
809  
810  
811  
812  
813  
814  
815  
816  
817  
818  
819

**Supplemental Figure 3. WNV infection and PRR agonist treatment in *Peli1*<sup>-/-</sup> DCs and macrophages.** **A-C.** WT and *Peli1*<sup>-/-</sup> DCs were infected with WNV. Viral load was measured at indicated time points by qPCR (**A**) and FFA (**B**). **C.** Cytokine RNA levels were measured at day 3. Data represent the means ± SEM of 3 to 6 samples from 2 independent experiments. **D- G.** WT and *Peli1*<sup>-/-</sup> macrophages were treated with TLR3, TLR7, and RLR agonists for 24 h. *Ifna*, *Ifnb*, *Il12* RNA and IL-6 protein levels were measured by qPCR or Bioplex. Data are presented as fold increase compared to NF or mock-treated cells. Data represent the means ± SEM of 3 to 4 samples are representative of 2 independent experiments. **A-G**, \*\* P < 0.01 or \*P < 0.05 compared to WT group (Unpaired t test). **H.** WT macrophages were infected at MOI of 0.02 with WNV passaged in WT (WTP) or *Peli1*<sup>-/-</sup> (*Peli1*<sup>-/-</sup>P) macrophages. At day 4 pi, IL-6 production was determined by Bioplex. Data represent the means ± SEM of 4 samples from 2 independent experiments. \*\* P < 0.01 compared to WTP group (Unpaired t test).

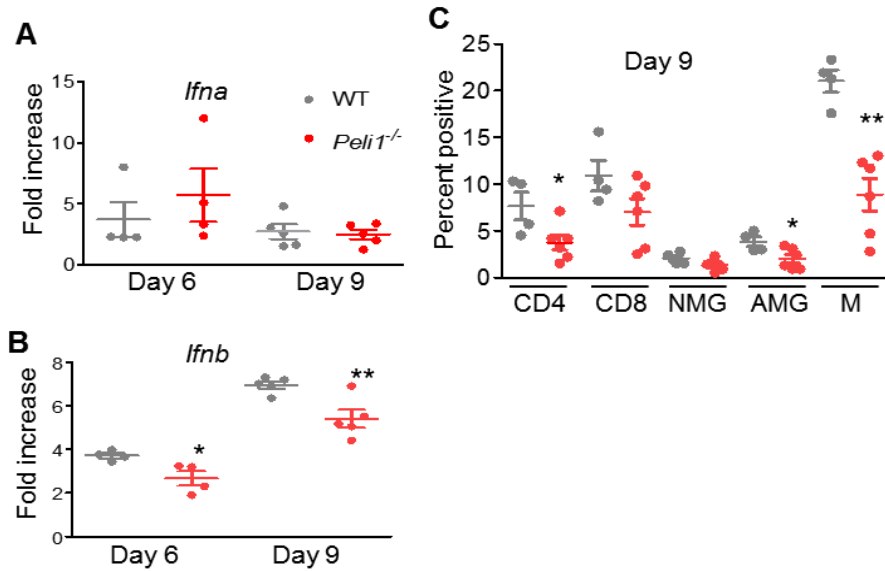

821  
822  
823  
824  
825  
826  
827  
828  
829  
830  
831  
832

**Supplemental Figure 4. Type I IFN induction and leukocyte infiltration in the CNS. A-B.** RNA levels of type I IFNs in the brain at indicated time points were determined by qPCR assay. Data are presented as fold increase compared to NF group (means  $\pm$  SEM) and represent 4 to 5 samples pooled from 2 independent experiments. **C.** Brain leukocyte infiltration following WNV 385-99 infection. The percentage (means  $\pm$  SEM) of brain leukocytes collected from 9 to 10 mice of 2 independent experiments, including naïve microglia cells (NMG), activated microglial cells (AMG), macrophages (M), CD4<sup>+</sup> and CD8<sup>+</sup> T cells on day 9 pi was analyzed by flow cytometry. \*\*  $P < 0.01$  or \*  $P < 0.05$  compared to WT group (Unpaired t test).

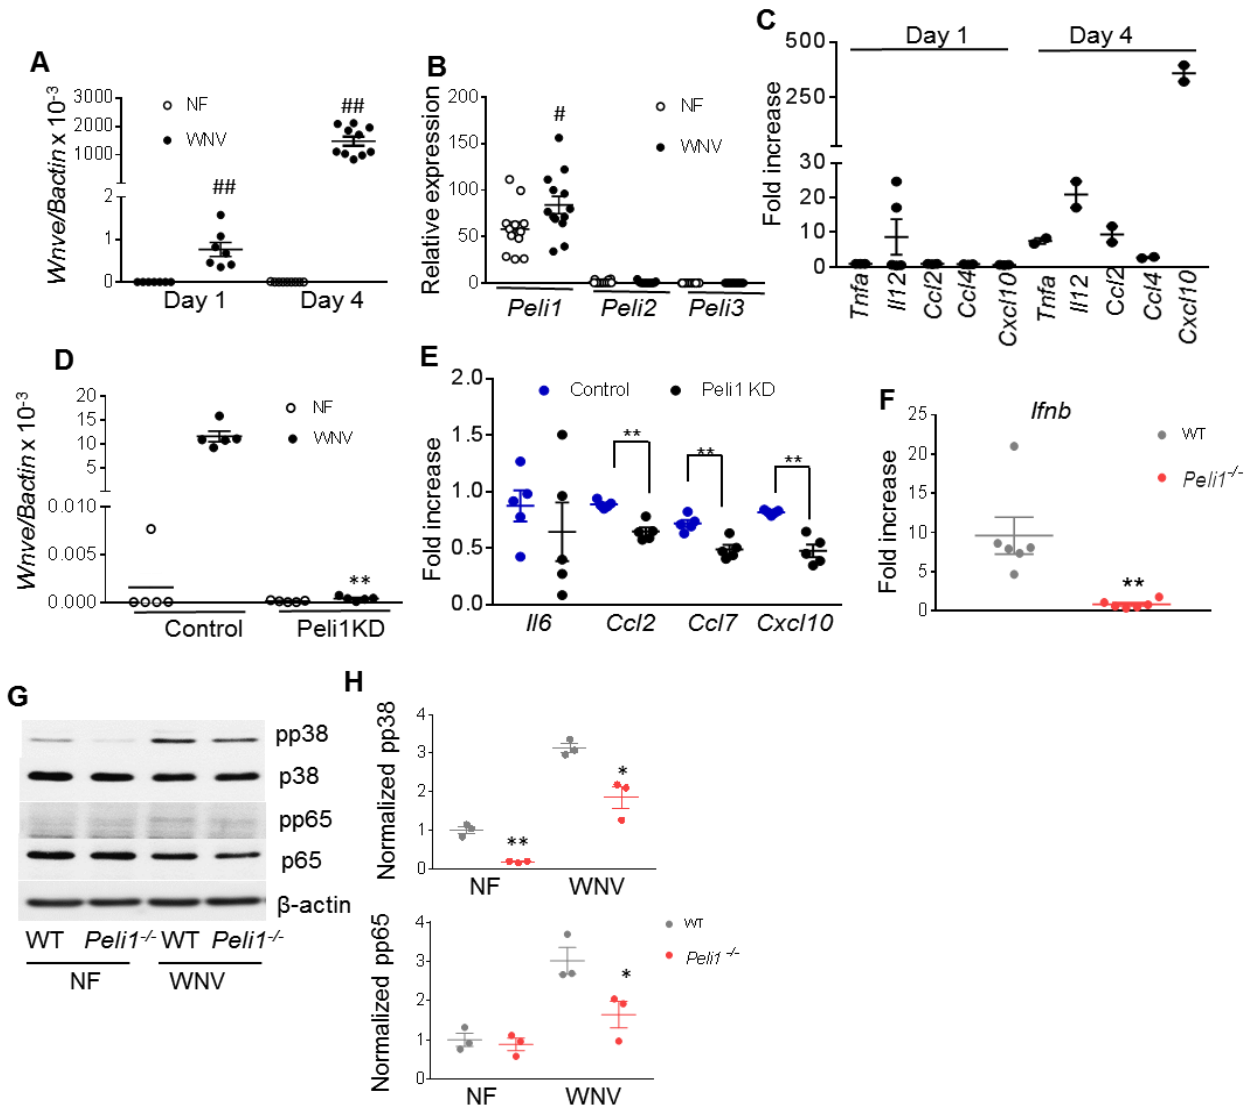

833  
 834 **Supplemental Figure 5. WNV infection in microglia and neurons.** **A-C.** BV2 cells were  
 835 infected with WNV 385-99. **A.** Viral load was measured at indicated time points by qPCR. Data  
 836 represent the means  $\pm$  SEM of 7 to 10 samples pooled from 2 independent experiments. **B.**  
 837 *Peli1*, *Peli2* and *Peli3* RNA levels in BV2 cells were measured by qPCR at day 4 pi. Data  
 838 represent the means  $\pm$  SEM of 12 to 13 samples pooled from 3 independent experiments. **A-B,**  
 839 ##  $P < 0.01$  or #  $P < 0.05$  compared to non-infected (NF) group (Unpaired t test). **C.** RNA levels of  
 840 cytokines were measured at indicated time points. Data are presented as means  $\pm$  SEM and are  
 841 representative of 2 independent experiments (n = 2 to 3). **D-E.** BV2 cells were treated with  
 842 control and Peli1 siRNA (Peli1KD) and infected with WNV 385-99 at 24 h. Data are presented  
 843 as means  $\pm$  SEM and are representative of 2 independent experiments (n = 5). \*\*  $P < 0.01$   
 844 compared to control group (Unpaired t test). **D.** Viral load was measured at day 4 by qPCR. **E.**  
 845 *Il6*, *Ccl2*, *Ccl7*, and *Cxcl10* RNA levels were measured at day 4. **F.** *lfnb* RNA levels in mouse  
 846 neurons at day 4 pi. Data are presented as means  $\pm$  SEM, n = 6 per group. **G-H.** Western blot  
 847 assay for p38MAPK and NF- $\kappa$ B activation in NF and WNV-infected neurons at day 3 pi. **G.** One  
 848 representative of three samples per group was shown. **H.** The densitometric analysis of western  
 849 blot data. Data presented as the ratio of pP65 or pP38 to  $\beta$ -actin compared to NF control. For  
 850 **F& H** panels, \*\*  $P < 0.01$  or \*  $P < 0.05$  compared to WT group (Unpaired t test).



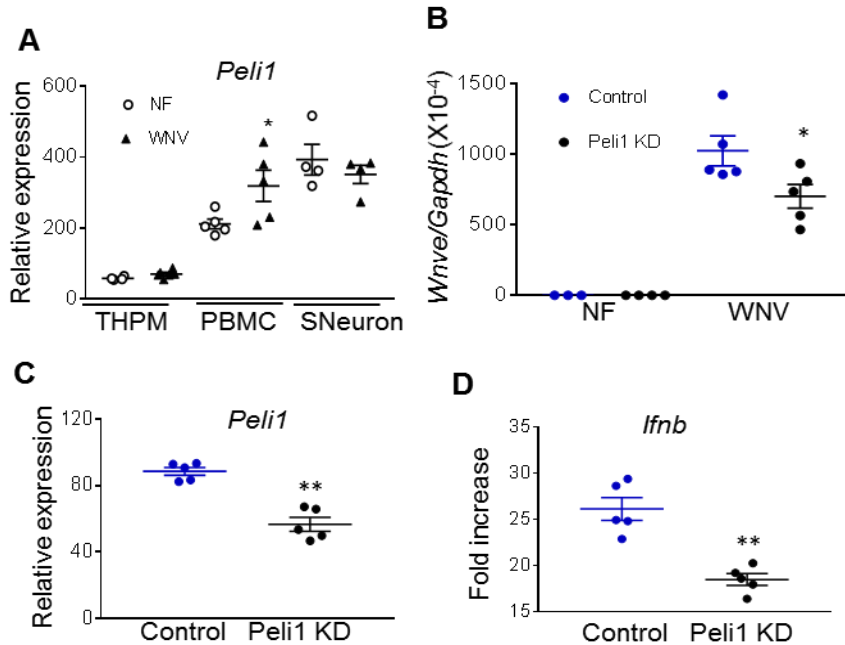

851  
852  
853  
854  
855  
856  
857  
858  
859  
860  
861  
862  
863

**Supplemental Figure 6. WNV infection in human cells.** **A.** RNA levels of *Peli1* in non-infected (NF) and WNV-infected hNSCs-derived neuron (SNeuron)s, THP1-derived macrophages (THPM) and peripheral blood mononuclear cell (PBMC)s were determined by qPCR assay. Data represent the means  $\pm$  SEM of 4 to 6 samples pooled from 2 independent experiments. # $P < 0.05$  compared to non-infected (NF) group (Unpaired t test). **B- D.** S-neurons were treated with control and Peli1 siRNA knockdown (Peli1KD), infected with WNV 385-99 at 48 h and harvested at day 4 pi. Viral load (**B**) and *lfnb* (**D**) levels were measured by qPCR. **C.** *Peli1* expression on control and Peli1 siRNA knockdown cells at 24 h post-treatment. Data represent the means  $\pm$  SEM and are representative from 2 independent experiments, n =4 to 5. \*\*  $P < 0.01$  compared to control group (Unpaired t test).

864

865

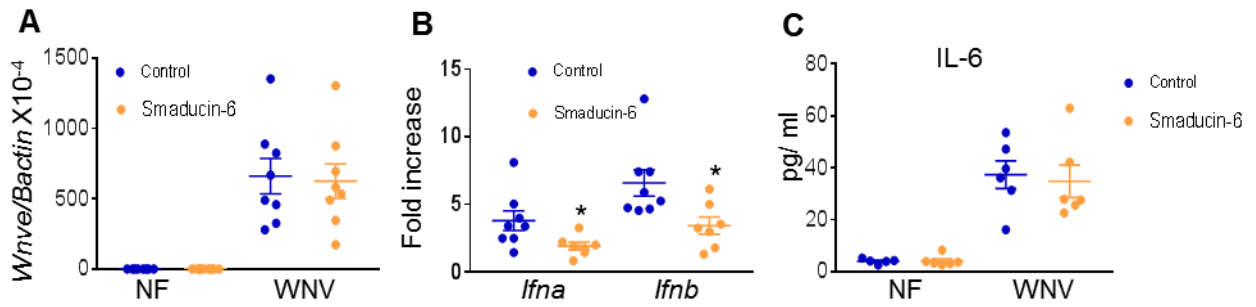

866

867

868

869

870

871

872

873

**Supplemental Figure 7. Smaducin-6 treatment in macrophages during WNV infection.** BM-macrophages were infected at MOI of 0.02 with WNV 385-99 and treated with Smaducin-6 or control peptides at 1 h pi. **A.** Viral load was measured at day 4 pi by qPCR. **B-C.** Cytokine levels were measured at day 4 by qPCR or Bioplex. Data are presented as fold increase compared to mock- infected or pg/ ml and represent the means  $\pm$  SEM of 8 samples pooled from 2 independent experiments.  $*P < 0.05$  compared to control group (Unpaired t test).

874 **Table S1: Serum cytokine levels at day 3 post infection**

875

| 876 Cytokine (pg/ml) | WT               | <i>Peli1</i> <sup>-/-</sup> |
|----------------------|------------------|-----------------------------|
| 878 IL-1 $\beta$     | 214.3 $\pm$ 5.2  | 184.1 $\pm$ 9.6*            |
| 879 IL-17            | 78.2 $\pm$ 10.5  | 87.2 $\pm$ 24.5             |
| 880 IFN- $\gamma$    | 22.3 $\pm$ 4.2   | 29.2 $\pm$ 2                |
| 881 IL-10            | 116.8 $\pm$ 10.5 | 70.6 $\pm$ 15.2*            |

882

883 Blood was harvested from WNV-infected mice at indicated time point post infection. Serum  
 884 cytokine was measured by Bioplex. Data represent the means  $\pm$  SEM and are representative of  
 885 2 independent experiments, n =4 per group. \*  $P < 0.05$  compared to WT group (Unpaired t  
 886 test).

887

888 **Supplemental Methods:**

889 **WNV infection in human cells:** HMC3 (human microglial cell line), THP-1 cells and  
890 PBMCs from healthy donors were purchased from ATCC and Astarte Biologics, Inc  
891 respectively. THP-1 cells were treated with phorbol 12-myristate 13-acetate (PMA, Sigma) to  
892 differentiate into macrophage cells as described previously (57) before infection with WNV at a  
893 MOI of 1. HMC3 cells and PBMC were infected with WNV at a MOI of 5 or 10 respectively.  
894 Human fetal cortical neural stem cells (hNSCs) were propagated as neurospheres in  
895 DMEM/F12 basic media supplemented with 20 ng/mL epidermal growth factor (EGF), 20 ng/mL  
896 fibroblast growth factor 2 (FGF2), 10 ng/mL leukemia inhibitor factor (LIF) and N2; and  
897 passaged every 10 days (58). For neuron differentiation, dissociated hNSCs were plated into  
898 T75 flasks. After a 3-day incubation,  $1.2 \times 10^6$  or  $5 \times 10^5$  hNSCs (small spheres) were seeded into  
899 T25 flasks or 6-well plates pre-coated with 0.01% poly-D-lysine and  $1 \mu\text{g}/\text{cm}^2$  laminin  
900 (Invitrogen), respectively. Cells were incubated for 4 days with the priming media containing  
901 EGF (20 ng/mL), LIF (10 ng/mL) and laminin ( $1 \mu\text{g}/\text{mL}$ ), followed by 9-day incubation with a  
902 differentiation medium consisting of N2 plus glutathione ( $1 \mu\text{g}/\text{mL}$ ) (Sigma), biotin ( $0.1 \mu\text{g}/\text{mL}$ )  
903 (Sigma), superoxide dismutase ( $2.5 \mu\text{g}/\text{mL}$ ) (Worthington), DL- $\alpha$ -tocopherol ( $1 \mu\text{g}/\text{mL}$ , Sigma),  
904 DL-- $\alpha$ -tocopherol acetate ( $1 \mu\text{g}/\text{mL}$ , Sigma) and catalase (Sigma). Cells were subsequently  
905 infected with WNV at a MOI of 1.

906 **In vitro T cell activation:** Splenocytes ( $0.3 \times 10^6$ ) were stimulated with WNV-specific  
907 NS3 and E peptides respectively (59) for CD4<sup>+</sup> T cells, or WNV-specific NS4B and E peptides  
908 (60, 61) for CD8<sup>+</sup> T cells for 72 h at 37°C. Culture supernatant was collected for cytokine assay.

909 **ELISA:** Microtiter plates were coated with recombinant WNV-E protein (62) overnight at  
910 4°C. Sera were diluted 1/30 in PBS with 2% BSA, and incubated for 1 h at room temperature.  
911 Alkaline phosphatase-conjugated goat anti-mouse IgG (Sigma-Aldrich, A3562) or IgM (Sigma-  
912 Aldrich, A9688) at a dilution of 1/1000 in 1XPBS with 0.05% Tween (Sigma-Aldrich) was then

913 added for 1 h. Color was developed with *p*-nitrophenyl phosphate (Sigma-Aldrich) and intensity  
914 read at an absorbance of 405 nm.

915           **siRNA knockdown for Peli1:** Mouse cells were transfected with 187.5nM of pooled  
916 Peli1 specific siRNA (CUCAUGACAGCAACACUGA, CAACCAUGGGUAUAUCUAA,  
917 CUUUACAGCUCGGAUUUUAU), or 187.5nM control siRNA (MISSION Universal Negative  
918 Control #1) (all from Sigma-Aldrich) by using Superfect (Qiagen) per the manufacturer's  
919 instructions. Human cells were transfected with 37.5 pM control siRNA or Peli1 siRNA (Santa  
920 Cruz Biotechnology) per the manufacturer's instructions. Transfected cells were grown in RPMI  
921 medium containing 10% FBS. QPCR analysis of Peli1mRNA was used to confirm the effects of  
922 the siRNA knockdown. At 48 h post-infection, cells were infected with WNV with MOI of 0.1  
923 (mouse cells) or MOI of 1 or 5 (human cells) respectively. Supernatants and cells were  
924 harvested at 24 h and 96 h pi to measure viral load and cytokine production.

925           **Cytokine Bioplex:** Analysis of cytokine production by using a Bio-Plex Pro Mouse  
926 Cytokine Assay (Bio-Rad).

927

928

929

930

931 **Supplemental References:**

- 932
- 933 57. Park EK, Jung HS, Yang HI, Yoo MC, Kim C, and Kim KS. Optimized THP-1
- 934 differentiation is required for the detection of responses to weak stimuli. *Inflamm Res.*
- 935 2007;56(1):45-50.
- 936 58. Wu P, Tarasenko YI, Gu Y, Huang LY, Coggeshall RE, and Yu Y. Region-specific
- 937 generation of cholinergic neurons from fetal human neural stem cells grafted in adult rat.
- 938 *Nature neuroscience.* 2002;5(12):1271-8.
- 939 59. Brien JD, Uhrlaub JL, and Nikolich-Zugich J. West Nile virus-specific CD4 T cells exhibit
- 940 direct antiviral cytokine secretion and cytotoxicity and are sufficient for antiviral
- 941 protection. *J Immunol.* 2008;181(12):8568-75.
- 942 60. Brien JD, Uhrlaub JL, and Nikolich-Zugich J. Protective capacity and epitope specificity
- 943 of CD8(+) T cells responding to lethal West Nile virus infection. *Eur J Immunol.*
- 944 2007;37(7):1855-63.
- 945 61. Purtha WE, Myers N, Mitaksov V, Sitati E, Connolly J, Fremont DH, et al. Antigen-
- 946 specific cytotoxic T lymphocytes protect against lethal West Nile virus encephalitis. *Eur J*
- 947 *Immunol.* 2007;37(7):1845-54.
- 948 62. Wang S, Welte T, McGargill M, Town T, Thompson J, Anderson JF, et al. Drak2
- 949 contributes to West Nile virus entry into the brain and lethal encephalitis. *J Immunol.*
- 950 2008;181(3):2084-91.

951

952

953

954

955
